# Supplementary material
Source: publisher figshare collection journal article supplement (https://gsapubs.figshare.com/articles/dataset/_/24045231)
Supplement: Supplementary file 1 [file 1]

Lovelace, D.M., Fitch, A.J., Schwartz, D., and Schmitz, M., 2023, Concurrence of Late Triassic lithostratigraphic, radioisotopic, and biostratigraphic data support a Carnian age for the Popo Agie Formation (Chugwater Group), Wyoming, USA: GSA Bulletin, <https://doi.org/10.1130/B36807.1>.

## Supplemental Material

**MDS Plot.fig.** 3D plot of dissimilarity between all samples.

**MDS Stress.fig.** Stress plot from MDS analysis.

**IGL\_report\_LAICPMS\_Lovelace09Feb22.pdf.** Analytica report.

**Zircon\_08Feb22\_Lovelace\_DH1\_RCR\_FinalDataTemplate.xlsx.** Additional analytical data for samples DH1 and RCR.

**Zircon\_18Oct21\_Lovelace\_DDS\_FinalDataTemplate.xlsx.** Analytical results from sample DDS.

**Zircon\_19Oct21\_Lovelace\_RCR\_FinalDataTemplate.xlsx.** Analytical results from sample RCR.

**Zircon\_19Oct21\_Lovelace\_ROY\_FinalDataTemplate.xlsx.** Analytical results from sample ROY.

**Zircon\_20Oct21\_Lovelace\_DH1\_FinalDataTemplate.xlsx.** Analytical results from sample DH1.

**Zircon\_20Oct21\_Lovelace\_DH2\_FinalDataTemplate.xlsx.** Analytical results from sample
