# Supplementary material
Source: publisher figshare collection journal article supplement (https://gsapubs.figshare.com/articles/dataset/_/24045231)
Supplement: Supplementary file 1 [file 1]

## Sheet: Table S1 Instrumental data
Table S1. Metadata for LA-ICP-MS U-(Th-)Pb analyses
Laboratory and Sample Preparation
Laboratory name	Boise State University Isotope Geology Laboratory
Sample type/mineral	Zircon
Sample preparation	Conventional mineral separation, 1 inch resin mount, 0.3 mm polish to finish
Imaging	CL, JEOL T300, 10 nA, 17 mm working distance
Laser ablation system
Make, Model and type	Teledyne (Photon Machines) Analyte Excite+
Ablation cell and volume	HelEx II active 2-volume ablation cell
Laser wavelength (nm)	193 nm ArF excimer
Pulse width (ns)	4 ns
Fluence (J cm-2)	energy stabilization mode, set daily at ~2.5 J cm-2 using in-cell EPC utility
Repetition rate (Hz)	5 Hz
Ablation duration (s)	20 s
Ablation pit depth / ablation rate	10 mm pit depth, measured using an optical microscope, equivalent to 0.1 mm/pulse
Spot diameter (mm)	20 mm
Sampling mode / pattern	Static spot ablation
Cell carrier gas flow (l min-1)	0.2 L min-1 He cup flow, 1.2 L min-1 He cell flow
ICP-MS Instrument
Make, Model and type	ThermoElectron, iCAP-RQ, single quadrupole mass spectrometer
Sample introduction	190 cm long, 1 cm i.d. PFA tubing with Teledyne 'SQUID' smoothing device, 2.5 mm quartz injector; Ni cones, high-sensitivity skimmer insert
RF power (W)	1400 W
Make-up gas flow (l min-1)	~0.65 l min-1 Ar and 2 mL min-1 N2 gas introduced in mixing bulbs between cell and torch
Detection system	single ion-counting SEM
Masses measured and dwell times per peak (ms)	29,91(5); 31,89,93,139,140,141,146,147,153,157,159,163,165,166,169,172,175,177,181(10); 202,204,208,232,238(40); 206(80); 49,207(200)
Total integration time (s)	~ 0.895 s
‘Sensitivity’ as useful yield	0.8% U [(#ions detected/#atoms sampled)*100; Schaltegger et al. 2015]
IC Dead time (ns)	44 ns
Data Processing
Gas blank	15 s on-peak zero subtracted.
Calibration strategy	Mean of ratios; mass discrimination from interspersed zircon standard materials.
Common-Pb correction	No common-Pb correction applied; sweeps with mass 204 signals above background rejected.
Data processing packages	ThermoElectron Qtegra TRA software for integrated cps acquisition; in-house Microsoft VBA coded spreadsheet for data normalisation, concentration calibration, uncertainty propagation and age calculation.
Uncertainty level and propagation	Ages quoted at 2s absolute; propagation is by quadratic addition. Systematic errors from reproducibility of primary reference material propagated where appropriate.
Discordance criteria	Discordance is the relative difference between the measured 207Pb/235U and 206Pb/238U dates; discordance outside of uncertainty of 5% is flagged with strikethrough font in Table S2.
Interpreted age transition	The transition from preferred interpretation of 207Pb/206Pb to 206Pb/38U dates is set at 1500 Ma; preferred date is flagged with bold font in Table S2.
Mass discrimination corrections	207Pb/206Pb fractionation error (from PL): 0.4% [Zircon_08Feb22_Lovelace_DH1_RCR]
	206Pb/238U fractionation error (from PL): 0.68% [Zircon_08Feb22_Lovelace_DH1_RCR]
	208Pb/232Th fractionation error (from PL): 2.25% [Zircon_08Feb22_Lovelace_DH1_RCR]
Quality control & validation standards	Plešovice (PL) (Slama et al. 2008); 336.9 Ma
	Zirconia (Covey et al., 2012); 327.2 Ma
	FC1 (Schoene et al. 2007); 1095.4 Ma
	91500 (Wiedenbeck et al., 1995); 1065.4 Ma
	Seiland (Kosler et al. 2008); 530.6 Ma
Quality control & validation results	Zircon_08Feb22_Lovelace_DH1_RCR: 91500 (206Pb/238U) = 1044.1 ± 18.3 (95% c.i., MSWD = 1.22, n = 7)
	Zircon_08Feb22_Lovelace_DH1_RCR: 91500 (207Pb/206Pb) = 1076.5 ± 40.5 (95% c.i., MSWD = 1.02, n = 7)
	Zircon_08Feb22_Lovelace_DH1_RCR: FC1 (206Pb/238U) = 1129.7 ± 21.3 (95% c.i., MSWD = 0.17, n = 7)
	Zircon_08Feb22_Lovelace_DH1_RCR: FC1 (207Pb/206Pb) = 1101.6 ± 14.9 (95% c.i., MSWD = 1.13, n = 7)
	Zircon_08Feb22_Lovelace_DH1_RCR: PL (206Pb/238U) = 337 ± 2.5 (95% c.i., MSWD = 0.8, n = 22)
	Zircon_08Feb22_Lovelace_DH1_RCR: PL (207Pb/206Pb) = 325.6 ± 20.4 (95% c.i., MSWD = 2.19, n = 22)
	Zircon_08Feb22_Lovelace_DH1_RCR: Seiland (206Pb/238U) = 532.7 ± 17.8 (95% c.i., MSWD = 3.63, n = 7)
	Zircon_08Feb22_Lovelace_DH1_RCR: Seiland (207Pb/206Pb) = 512.6 ± 145.2 (95% c.i., MSWD = 3.24, n = 7)
	Zircon_08Feb22_Lovelace_DH1_RCR: Zirconia (206Pb/238U) = 330.3 ± 5.6 (95% c.i., MSWD = 1.08, n = 7)
	Zircon_08Feb22_Lovelace_DH1_RCR: Zirconia (207Pb/206Pb) = 279.4 ± 61 (95% c.i., MSWD = 1.33, n = 7)

## Sheet: Table S2 Sample data
Table S2. U-Pb isotope ratios and trace element concentrations by LA-ICPMS: sample data
				Composition									Corrected isotope ratios													Dates (Ma)																	Concentrations (ppm)
	U	Th	Pb		206Pb	206Pb			208Pb	±2s	207Pb	±2s	206Pb	±2s	error	238U	±2s	207Pb	±2s	208Pb	±2s	±2s-sys	207Pb	±2s	±2s-sys	207Pb	±2s	±2s-sys	206Pb	±2s	±2s-sys	disc.	±2s
Analysis	ppm	ppm	ppm	Th/U	cps	204Pb	±1s		232Th	(%)	235U	(%)	238U	(%)	corr.	206Pb	(%)	206Pb	(%)	232Th	(Ma)	(Ma)	206Pb	(Ma)	(Ma)	235U	(Ma)	(Ma)	238U	(Ma)	(Ma)	(%)	(%)	P	Ti	Y	Nb	La	Ce	Pr	Nd	Sm	Eu	Gd	Tb	Dy	Ho	Er	Tm
DH1_S_65	285.262	299.191	13.7992	1.04883	8437.46	229.014	4.38149		0.0111497	5.94274	0.243104	7.38477	0.0349547	3.66103	0.483628	28.6085	3.66103	0.0504411	6.4134	224.112	13.2448	16.6042	215.363	148.519	149.698	220.959	14.664	14.9947	221.484	7.97088	8.49812	-0.237603	7.56745	332.439	10.9174	2334.41	6.4294		47.053	0.124902	2.10958	5.49383	1.63428	32.0649	13.2831	182.872	79.2275	376.262	81.9729
DH1_S_51	280.997	445.189	15.5272	1.58432	8355.43	7298.79	276.418		0.0112007	4.48223	0.239119	7.62694	0.0358177	3.19529	0.405502	27.9191	3.19529	0.0484189	6.92534	225.131	10.0349	14.2328	119.751	163.221	164.332	217.699	14.9445	15.2599	226.857	7.12268	7.73335	-4.20675	7.86625	691.384	10.6511	3039.07	3.41543	0.0677712	55.0285	0.267288	5.76413	12.469	4.31853	71.7147	22.9746	267.132	104.16	439.689	90.1721
DH1_S_29	129.024	214.422	7.42303	1.66188	3715.62	270.86	20.2191		0.0109317	8.14663	0.255977	12.9002	0.0376242	6.47137	0.497728	26.5786	6.47137	0.0493438	11.1596	219.753	17.8055	20.3734	164.202	260.859	261.544	231.42	26.6959	26.893	238.09	15.1266	15.4502	-2.88222	13.5491	398.658	6.90409	2064.67	2.08819		49.1165	0.312357	6.17371	9.81545	3.92815	55.2043	16.877	193.603	72.4705	319.607	63.67
DH1_S_43	117.439	139.703	6.39823	1.18957	3697.52	3697.52	62.5311		0.0122766	12.2846	0.285561	18.7991	0.0379235	4.79353	0.251351	26.3689	4.79353	0.0546122	18.1777	246.625	30.1127	32.082	396.385	407.548	407.952	255.06	42.4008	42.5488	239.949	11.2906	11.7284	5.9244	16.2534	339.348	8.96813	1934.58	2.03966	0.0170236	38.357	0.143957	2.87785	6.90435	1.96785	40.6787	14.2795	164.45	66.5262	292.747	59.6327
RCR_S_89	464.887	271.938	30.3421	0.584956	20780.3	2852.42	32.3527		0.0175253	6.08217	0.391499	4.88384	0.0519608	3.93829	0.789331	19.2453	3.93829	0.0546454	2.88821	351.156	21.1735	26.2713	397.74	64.7391	67.2377	335.464	13.9521	14.6696	326.548	12.5401	13.2708	2.65763	5.51037	426.884	10.1026	2129.25	4.49548		25.2856	0.104781	2.23661	4.69584	1.06441	32.6205	12.4148	164.222	68.0107	324.464	73.3812
RCR_S_78	63.0335	92.8905	4.94273	1.47367	2809.65	76.8713	2.08657		0.0153734	7.92772	0.405585	13.5793	0.0530014	4.39333	0.318034	18.8674	4.39333	0.0555	12.849	308.365	24.2608	27.8644	432.432	286.267	286.835	345.691	39.7861	40.0533	332.922	14.2551	14.9153	3.69355	11.8263	203.258	15.6641	440.588	1.21517	0.0393341	31.8464	0.19857	3.59795	5.3043	1.71856	15.5847	4.77499	46.2391	14.9465	59.2833	12.4998
DH1_S_42	803.084	239.075	50.6911	0.297696	37864.8	3875.4	81.0867		0.0163278	5.44775	0.409576	3.65717	0.0546605	3.25836	0.863463	18.2947	3.25836	0.0543449	1.66072	327.355	17.6898	22.9852	385.341	37.3066	41.5014	348.569	10.79	11.7628	343.071	10.8863	11.8039	1.5773	4.36305	204.286	5.81136	894.422	3.33575		8.46538	0.0356672	1.16601	2.9679	0.153903	18.4725	6.86857	79.2521	30.2003	137.795	29.102
DH1_S_11	1110.44	25.2356	67.9865	0.0227258	51169.3	1026.38	66.221		0.0353946	29.6504	0.446368	2.99258	0.0562081	1.82233	0.548954	17.791	1.82233	0.057596	2.37374	703.031	204.868	207.27	514.398	52.1444	55.089	374.733	9.37756	10.6185	352.524	6.25164	7.81809	5.92663	2.88535	448.32	4.40458	753.37	1.56304	0.166937	22.6494	0.334923	2.02878	1.97075	0.651727	6.63769	3.36638	51.7113	24.9475	147.081	42.1257
RCR_S_126	170.223	120.657	12.29	0.708814	7727.21	163.634	4.89583		0.017852	6.28765	0.425835	6.83938	0.056536	4.55975	0.656155	17.6878	4.55975	0.0546279	5.09762	357.644	22.2896	27.267	397.029	114.277	115.713	360.215	20.7405	21.2902	354.525	15.729	16.4158	1.57964	7.15402	276.131	6.87343	1451.88	0.639387		11.8006	0.156281	2.90314	3.94423	1.6227	25.2925	8.88516	111.069	44.612	223.659	50.1869
RCR_S_112	214.91	27.0264	13.6771	0.125757	9764.52	1062.99	22.1691		0.0322366	25.2438	0.406177	5.77801	0.0566714	2.87266	0.477384	17.6456	2.87266	0.0519816	5.01331	641.288	159.344	161.796	284.576	114.653	116.142	346.119	16.9467	17.572	355.351	9.93176	10.9902	-2.66742	5.78814	158.931	4.64353	532.238	2.32965		3.07169	0.0582234	0.674996	1.31285	0.30976	8.85801	2.86402	40.5599	17.3234	90.5527	22.4694
RCR_S_92	666.286	174.287	44.087	0.26158	31504.7	1399.29	46.5162		0.0208216	8.08487	0.471558	5.22711	0.0568017	3.54443	0.660372	17.6051	3.54443	0.0602106	3.84184	416.529	33.3312	38.0763	611.126	83.0252	84.8511	392.265	17.0078	17.779	356.145	12.2809	13.1666	9.2079	5.02975	384.103	10.3287	1426.84	3.30738	0.960389	82.2101	1.65807	13.4234	11.9153	3.45887	35.0465	11.3216	133.624	47.9535	206.834	43.4519
DH1_S_18	335.203	88.5185	22.3987	0.264075	15503.1	1233.02	20.0374		0.0220386	9.50257	0.45842	4.70219	0.0575668	3.14336	0.646345	17.3711	3.14336	0.057755	3.49712	440.61	41.4162	45.9067	520.485	76.7408	78.7677	383.158	15.0076	15.8261	360.811	11.03	12.0045	5.83237	4.67878	122.226	3.40195	219.448	0.765677		13.9233	0.0619998	0.50251	0.997911	0.331313	5.52461	1.30372	18.5337	6.7954	36.1401	9.01138
DH1_S_63	492.053	87.8416	32.3908	0.17852	23668.3	23668.3	542.566		0.0207131	5.88823	0.453747	4.78181	0.0585233	4.28475	0.880051	17.0872	4.28475	0.056232	2.12288	414.379	24.1512	30.383	461.535	47.0589	50.366	379.9	15.1547	15.9647	366.639	15.2712	16.0236	3.49075	5.56599	519.475	5.98731	1560.63	1.78282		2.65173	0.097578	1.89181	4.67351	0.357615	30.0337	11.8368	136.777	54.202	246.335	54.3803
RCR_S_109	445.196	168.814	32.8625	0.379189	23479.9	5735.73	83.7068		0.0216271	8.25888	0.504853	8.75496	0.0616247	4.33666	0.486688	16.2273	4.33666	0.0594168	7.60545	432.47	35.3378	40.1361	582.413	165.151	166.085	414.982	29.8233	30.3113	385.498	16.2277	17.0163	7.10487	7.73699	345.755	6.80866	1291.17	14.7356	0.852196	21.5862	0.36786	3.65267	3.56727	0.727783	13.9797	6.4342	92.4412	39.2307	211.131	49.1747
DH1_S_6	677.526	196.331	48.783	0.289777	32671.7	1201.46	19.8293		0.0202259	8.89607	0.482693	3.89766	0.0620641	3.36003	0.837084	16.1124	3.36003	0.0564065	1.97534	404.73	35.647	40.0525	468.404	43.7362	47.2609	399.918	12.8841	13.9028	388.166	12.6576	13.6518	2.93869	4.44923	375.689	2.21969	1367.44	3.06645		12.495	0.143432	3.00483	5.7396	0.532132	28.997	10.0513	128.368	49.1104	226.902	50.2426
DH1_S_3	352.117	405.247	31.7203	1.15089	15678.8	525.696	18.3838		0.019226	4.57318	0.521077	5.96635	0.0640511	3.11896	0.50518	15.6125	3.11896	0.059003	5.0862	384.91	17.4361	24.6225	567.191	110.731	112.122	425.871	20.7534	21.4617	400.215	12.103	13.185	6.02421	5.38975	147.581	11.4604	1174.2	0.914113	0.0807861	18.3942	0.388716	5.906	8.21933	3.24957	33.8736	9.90008	110.321	39.3728	172.759	37.9994
DH1_S_58	837.165	5.25958	58.899	0.00628261	45384.9	2586.91	95.9587		0.0436982	32.0719	0.490369	3.11813	0.0655561	2.55614	0.77864	15.2541	2.55614	0.0542511	1.78575	864.482	271.41	274.067	381.5	40.1415	44.075	405.162	10.4172	11.6994	409.327	10.1377	11.5076	-1.02798	3.60666	408.909	1.78138	897.514	1.50822		1.29028		0.130906	0.57769	0.292593	4.28117	3.18402	64.1936	30.634	156.738	43.0111
DH1_S_67	455.969	289.776	37.7615	0.635518	26344.1	1147.72	9.26941		0.0202513	4.26094	0.509248	5.01438	0.0658216	3.76234	0.73293	15.1926	3.76234	0.0561125	3.31494	405.233	17.0948	24.8379	456.792	73.5448	75.7074	417.943	17.1797	18.0184	410.933	14.9782	15.9315	1.6774	5.40167	264.16	4.67733	1159.45	4.40838		32.1107	0.0526532	1.33378	3.90912	0.65062	22.3005	7.29798	96.1199	39.5753	178.332	40.8819
DH1_S_13	198.969	110.358	16.2904	0.554647	10400.7	320.449	13.0878		0.0207347	10.7779	0.549862	8.6785	0.0664032	4.38691	0.496897	15.0595	4.38691	0.060057	7.48809	414.807	44.2519	48.0362	605.652	161.968	162.91	444.906	31.2633	31.7712	414.45	17.6094	18.4199	6.84562	7.64949	261.831	14.0276	976.852	1.49267	0.00888246	12.0318	0.136625	1.56608	4.27807	0.83382	22.6641	7.68106	86.9475	34.7781	150.239	32.037
RCR_S_81	250.928	256.974	23.2057	1.0241	15091	15091	433.658		0.0210522	4.94245	0.508637	5.55027	0.067115	3.90092	0.687683	14.8998	3.90092	0.0549651	3.9482	421.093	20.597	27.7884	410.816	88.2958	90.1348	417.532	19.0006	19.7578	418.751	15.8159	16.7489	-0.291924	5.93114	336.328	10.8075	1589.66	4.87287		48.5084	0.12331	3.49909	6.0029	1.25708	33.6238	11.4867	138.443	53.1081	248.954	51.5876
RCR_S_88	201.424	150.596	17.8328	0.747656	11357.4	11372.9	466.778		0.0227191	5.17983	0.569806	7.61125	0.0674052	4.81654	0.623868	14.8356	4.81654	0.0613101	5.89339	454.063	23.2575	30.7148	650.105	126.537	127.727	457.889	28.0522	28.6516	420.504	19.6073	20.3724	8.16459	7.07042	310.682	6.36559	1399.57	1.22954	0.0144271	12.6233	0.14793	2.59227	5.9337	0.499241	31.1643	11.2435	130.211	47.1926	205.77	41.8683
RCR_S_87	111.368	90.6346	9.96912	0.813829	6569.72	436.996	5.40818		0.0221404	7.49939	0.525385	7.71574	0.067814	4.85834	0.620913	14.7462	4.85834	0.0561898	5.99409	442.623	32.8332	38.2208	459.891	132.91	134.118	428.743	26.984	27.5435	422.972	19.8898	20.6498	1.34592	7.7507	197.988	10.3162	565.429	0.669849		10.2667	0.0773148	1.67152	1.8464	0.782376	11.6378	4.13956	49.6254	18.4169	84.7174	19.6243
RCR_S_131	247.52	185.346	23.9627	0.748811	15571.9	4289.55	82.1671		0.022584	3.61171	0.643073	4.57888	0.0750896	4.23606	0.908187	13.3174	4.23606	0.0621125	1.73836	451.392	16.1223	25.4938	677.955	37.153	40.9951	504.207	18.1967	19.2622	466.746	19.0729	20.042	7.42962	5.04682	290.139	4.35817	1746.79	3.14487	0.113017	34.1808	0.363722	3.97809	6.5416	1.45913	26.9936	10.3443	127.795	53.737	261.94	58.1554
DH1_S_32	189.053	110.435	19.0768	0.58415	11430.9	247.423	3.02745		0.0348901	29.8304	0.729874	17.9448	0.075219	5.52642	0.304665	13.2945	5.52642	0.0703751	17.0727	693.18	203.273	205.601	939.33	349.961	350.354	556.479	76.8781	77.1733	467.522	24.9226	25.6555	15.9857	12.4408	246.825	5.81798	967.545	6.08104		27.0801	0.0467493	0.881014	2.05831	0.23586	15.957	6.03167	79.1326	32.0687	156.366	35.2909
RCR_S_96	191.078	1.88972	17.0418	0.0098898	13206.4	483.053	22.3673		0.0755407	34.8675	0.663078	5.0035	0.0835539	3.11932	0.602399	11.9683	3.11932	0.0575568	3.91214	1471.92	494.98	499.017	512.939	85.9584	87.7824	516.495	20.2561	21.2463	517.301	15.5058	16.9165	-0.15602	4.94384	127.767	1.75221	276.55	1.50054	0.0564896	0.710177	0.0196191	0.925421	0.17296	0.227118	3.35457	1.02634	17.0016	7.73152	46.6216	14.6217
RCR_S_137	1010.03	235.35	99.4179	0.233012	73944.2	18732.6	279.807		0.0278173	4.55867	0.695857	4.29	0.0845756	3.83706	0.874451	11.8237	3.83706	0.0596725	1.9186	554.57	24.9374	34.7322	591.714	41.5973	45.1593	536.313	17.8738	19.104	523.376	19.2887	20.5343	2.41226	4.84899	123.159	3.70993	1240.91	0.531454		4.69365	0.0955705	1.8654	3.95825	0.870926	21.5917	7.10647	90.6367	38.3875	188.262	44.1717
RCR_S_114	71.7382	36.1002	7.58269	0.503222	4635.9	10571.3	299.464		0.0281367	10.7375	0.704238	9.77009	0.0866676	3.75447	0.375327	11.5383	3.75447	0.0589334	9.0199	560.848	59.3934	64.2702	564.6	196.459	197.25	541.319	40.9938	41.528	535.799	19.3031	20.5289	1.01977	8.3007	791.546	15.3128	2006.48	1.06564	0.295503	10.1443	0.16217	2.13826	4.68658	1.02463	29.8604	12.1602	160.694	69.3769	319.899	69.2943
DH1_S_5	426.112	291.387	46.9912	0.683826	28241.1	28241.1	1314.12		0.0264091	4.88682	0.67063	4.10248	0.0867174	3.24441	0.766265	11.5317	3.24441	0.0560887	2.5108	526.857	25.4139	34.7533	455.912	55.7111	58.5307	521.095	16.7216	17.9162	536.094	16.6895	18.0867	-2.87833	4.59961	508.167	4.27296	2187.5	4.55165		24.4197	0.172387	3.67181	7.75446	0.922609	41.7993	15.4423	187.087	75.4081	371.276	78.4343
RCR_S_119	505.689	20.9599	48.4093	0.0414482	37703.5	37703.5	1778.49		0.0251688	16.9642	0.703169	4.2187	0.0885705	3.65435	0.844918	11.2904	3.65435	0.0575797	2.10787	502.42	84.181	87.0112	513.788	46.3085	49.6145	540.682	17.6852	18.9125	547.077	19.1673	20.4847	-1.18278	4.8498	299.931	2.72258	619.38	0.673026	0.0157373	1.82187	0.0200476	0.389128	2.06529	0.380691	14.2051	5.51557	61.778	19.9327	79.6089	15.9178
DH1_S_14	451.029	440.77	55.3613	0.977254	34258.6	7810.7	579.322		0.027656	4.5218	0.738214	5.58942	0.0894691	4.85402	0.85637	11.177	4.85402	0.0598422	2.7713	551.397	24.5961	34.8957	597.857	60.023	62.528	561.363	24.1032	25.05	552.397	25.6967	26.6855	1.59717	6.22943	894.056	8.71841	3671.34	8.1187	0.381272	34.4893	0.430277	5.66105	9.99492	1.30618	69.9831	26.4073	325.761	131.679	583.35	120.357
DH1_S_56	569.569	331.53	63.8709	0.58207	42633	3478.53	202.574		0.027683	5.46712	0.732842	5.35939	0.08949	4.90151	0.90209	11.1744	4.90151	0.0593929	2.16754	551.928	29.7663	38.5675	581.558	47.0741	50.2506	558.22	23.0142	24.008	552.52	25.9537	26.9494	1.02109	6.18617	527.092	2.3541	1237.89	3.67448	2.85354	23.3617	0.846325	5.82223	4.45723	0.48328	25.8225	7.80145	100.781	39.4175	183.231	40.2163
RCR_S_74	824.448	1008.87	109.717	1.22369	67285.5	2585.56	93.1067		0.0284468	2.95325	0.753136	4.13186	0.0905848	3.461	0.814701	11.0394	3.461	0.0602999	2.25694	566.945	16.5107	30.0067	614.353	48.7474	51.7912	570.043	18.0233	19.3383	558.995	18.5317	19.9661	1.93802	4.49238	427.452	6.21665	2190.62	4.05983		40.8875	0.168173	2.70839	7.52422	1.17971	43.015	15.2443	187.526	73.8079	340.109	76.3639
DH1_S_60	58.9064	33.97	6.61854	0.576677	4479.63	365.502	7.27558		0.0266748	12.1606	0.81264	9.34615	0.0913352	5.45417	0.577143	10.9487	5.45417	0.0645296	7.58964	532.089	63.8611	68.0877	759.007	160.079	160.987	603.934	42.5451	43.1448	563.429	29.4257	30.3146	6.70687	8.18128	157.354	16.0006	411.084	0.662781		8.58434		0.514859	0.849075	0.378042	7.66126	2.60197	34.6805	13.7237	63.3386	14.055
DH1_S_64	242.651	248.821	30.8434	1.02543	19208.5	1207.23	28.9388		0.0280204	5.17899	0.78389	5.99058	0.092368	4.90251	0.807208	10.8263	4.90251	0.0615506	3.44273	558.564	28.5319	37.7753	658.5	73.8164	75.8307	587.7	26.7292	27.6457	569.527	26.7233	27.7313	3.09233	6.33259	202.869	7.46707	724.015	1.18254		21.9565	0.0276073	0.640756	1.87537	0.602253	11.9449	4.34672	53.2742	22.4079	106.122	24.5819
RCR_S_122	110.216	131.915	14.7476	1.19688	8164.98	8164.98	142.188		0.0297117	4.53052	0.743232	6.73243	0.0929671	3.49751	0.505549	10.7565	3.49751	0.0579821	5.75266	591.789	26.4224	36.9688	529.068	126.053	127.298	564.29	29.1455	29.9422	573.061	19.1778	20.5806	-1.55439	6.25005	238.874	10.1983	1226.89	1.8719		21.9452	0.0792075	3.21903	6.50542	1.07344	31.1032	9.87041	120.121	42.2938	178.021	36.6651
DH1_S_45	339.122	441.812	46.53	1.30281	26831.9	18351.3	1385.31		0.0284028	3.83879	0.786878	4.93315	0.0938596	3.7597	0.744466	10.6542	3.7597	0.0608034	3.19383	566.08	21.4291	33.0745	632.288	68.7771	70.9517	589.4	22.058	23.1661	578.323	20.7964	22.1164	1.87928	5.09256	274.623	5.81116	2920.01	9.68975	0.0934968	31.1538	0.767021	14.9491	29.1809	0.90962	122.91	35.9729	348.632	116.015	432.385	73.9634
RCR_S_102	348.508	445.011	48.7804	1.2769	27094.5	2732.2	75.4146		0.030123	3.69329	0.828611	4.66141	0.0948393	4.0975	0.861836	10.5442	4.0975	0.0633667	2.22244	599.86	21.829	34.1942	720.559	47.1681	50.2055	612.841	21.4475	22.6627	584.094	22.881	24.1251	4.69082	5.00654	501.827	8.34025	3165.8	4.18665	1.28282	25.3874	1.63105	23.3898	34.1601	4.93455	138.72	36.1449	333.909	114.402	425.5	81.0344
RCR_S_129	70.3187	44.0467	8.50545	0.626386	5561.42	409.031	11.9639		0.0315012	6.71455	0.807279	7.43303	0.095591	3.64545	0.478311	10.4612	3.64545	0.0612499	6.4777	626.883	41.4463	49.6393	648.022	139.129	140.215	600.926	33.7128	34.4705	588.519	20.5039	21.8877	2.06479	6.46756	163.967	9.45783	1062.28	1.32006		4.08592	0.0857142	3.43057	7.43736	0.289458	36.2608	10.9074	113.327	39.3704	155.73	27.7284
DH1_S_19	45.4593	139.819	8.60923	3.0757	3476.2	1199.04	19.6286		0.0296277	6.57957	0.402238	19.0749	0.095638	5.10054	0.264031	10.4561	5.10054	0.0305036	18.3803	590.14	38.2673	46.5015	-1108.06	558.25	558.79	343.27	55.5589	55.7464	588.795	28.701	29.6804	-71.5254	28.9935	285.658	20.4365	1466.02	1.26154	0.0826962	31.0743	0.871505	10.0212	11.7801	2.69327	48.1701	13.5227	142.017	50.6848	200.866	37.7294
DH1_S_40	151.354	71.3345	18.5713	0.47131	11850.7	11850.7	145.955		0.0427876	4.95917	0.846056	5.0952	0.0963643	3.75467	0.719783	10.3773	3.75467	0.0636769	3.44434	846.839	41.1286	55.6559	730.9	72.9786	74.9663	622.482	23.7107	24.8179	593.067	21.2741	22.6099	4.7255	4.985	173.378	3.97035	440.543	1.62039	0.021838	26.9871	0.0656598	1.033	1.28368	0.546318	9.00481	2.90058	38.1364	14.2883	68.9521	15.8832
RCR_S_71	41.9576	28.6451	5.13751	0.682715	3429.04	4855.59	86.8809		0.0306372	9.81244	0.738077	13.4177	0.0964852	4.93539	0.362875	10.3643	4.93539	0.0554804	12.477	609.947	58.9566	64.8211	431.636	278.021	278.606	561.282	57.8549	58.2526	593.778	27.9961	29.0276	-5.78953	11.991	252.38	12.733	781.129	1.07792		14.8914	0.0995096	1.4713	4.29528	1.72834	21.4575	6.22102	73.1203	26.1634	115.014	25.853
DH1_S_50	248.117	96.3665	28.5152	0.388392	20824.9	1187.01	25.5876		0.0298114	6.53511	0.832098	4.03083	0.0969057	2.04967	0.468837	10.3193	2.04967	0.0622765	3.4708	593.746	38.2376	46.4563	683.597	74.1104	76.0995	614.776	18.5887	19.9673	596.249	11.673	14.0022	3.01353	3.49357	144.342	6.01306	646.72	2.05234		7.75495	0.0411566	1.64819	2.64915	0.311198	15.5175	5.14056	56.6987	20.5864	93.5192	18.7282
RCR_S_94	329.293	174.523	39.6097	0.529993	27711	894.062	20.2341		0.0308946	3.72226	0.813614	3.66663	0.0973147	2.74638	0.716429	10.2759	2.74638	0.0606371	2.42931	614.994	22.5469	35.204	626.402	52.3646	55.2	604.479	16.7021	18.2051	598.653	15.7009	17.5417	0.963858	3.77288	153.61	2.32124	464.596	1.18992		11.855	0.049119	0.172649	0.956828	0.343638	6.29434	2.66785	32.2104	13.8228	72.1739	17.7693
RCR_S_80	1303.95	53.241	142.391	0.0408304	113427	25165	517.933		0.0307187	6.06609	0.818871	3.56554	0.097562	3.07403	0.832223	10.2499	3.07403	0.0608742	1.80648	611.546	36.5413	45.4155	634.81	38.8847	42.6146	607.418	16.2993	17.9232	600.105	17.6148	19.3924	1.20392	3.9291	195.878	11.5621	268.138	0.691539		1.3033	0.113389	1.42288	5.4298	0.0732903	25.4071	6.16857	43.7149	9.41887	26.3543	3.70504
RCR_S_104	676.488	465.024	86.5619	0.687409	56759.4	8116.9	112.347		0.0309293	3.77022	0.834577	3.93718	0.0986818	3.51508	0.869067	10.1336	3.51508	0.0613378	1.77359	615.674	22.8623	35.3743	651.086	38.0744	41.8603	616.149	18.1864	19.6408	606.679	20.3526	21.8783	1.53687	4.3997	195.343	3.4994	504.19	2.63212		22.1272	0.0167209	0.525315	1.33147	0.640422	7.8617	2.62302	34.1905	15.5748	73.9376	19.2291
RCR_S_139	199.072	253.807	28.5375	1.27495	16999.7	1821.64	22.4026		0.0299959	5.15277	0.797692	4.91491	0.0990715	4.38382	0.876688	10.0937	4.38382	0.0583963	2.22225	597.367	30.3305	39.9522	544.662	48.5647	51.6965	595.526	22.1445	23.2761	608.965	25.4738	26.6873	-2.25675	5.72324	318.554	10.3081	2088.99	3.82486		49.7439	0.154464	3.36589	6.51797	2.9274	41.7028	14.0978	179.916	70.4531	318.594	69.1099
DH1_S_57	374.504	239.891	46.7026	0.640557	31954.5	31954.5	467.637		0.0293154	3.66847	0.817712	5.11478	0.0991049	4.06112	0.778217	10.0903	4.06112	0.0598417	3.10939	584.008	21.1176	33.4187	597.859	67.3449	69.5906	606.771	23.3632	24.4625	609.161	23.6058	24.9043	-0.393846	5.48433	213.526	2.96114	1605.57	10.898		14.9177	0.0190306	1.55242	3.96004	0.596813	33.5988	11.3744	143.016	57.7666	245.463	49.0916
RCR_S_132	319.086	368.42	45.2173	1.15461	26601.3	6537.72	111.277		0.0305261	3.05627	0.820056	3.2376	0.0998481	2.37132	0.689622	10.0152	2.37132	0.0595665	2.20429	607.769	18.2986	32.1901	587.894	47.8212	50.9533	608.079	14.812	16.512	613.519	13.8777	16.0379	-0.894518	3.35388	201.545	3.77443	1202.13	1.83288	0.022778	41.7819	0.264717	4.02975	6.88227	2.79675	27.8582	9.02786	96.8597	37.9396	171.394	39.0731
RCR_S_79	253.568	196.109	33.4467	0.773401	21228.4	9171.99	1113.91		0.0313766	4.40489	0.870948	5.20955	0.100879	3.57072	0.667784	9.91285	3.57072	0.0626166	3.79333	624.442	27.0854	38.6226	695.21	80.8431	82.6656	636.082	24.6241	25.7388	619.559	21.0929	22.5765	2.59761	5.02137	238.768	14.5091	602.661	1.77855	0.260586	20.2515	0.234461	4.92391	7.49733	1.50515	27.8649	7.91967	65.9592	20.1597	75.4875	14.2804
RCR_S_101	84.2713	66.9609	11.3945	0.794587	7307.72	9996.3	161.421		0.0335152	7.41775	0.877346	6.10648	0.10238	4.15542	0.667555	9.76756	4.15542	0.0621521	4.47455	666.309	48.6193	56.7104	679.357	95.6084	97.1635	639.548	28.9766	29.933	628.34	24.878	26.1737	1.75252	5.91156	237.302	14.8088	901.41	1.09015		10.0347	0.109091	2.28284	3.901	0.991191	19.4684	6.14935	74.9825	29.4015	141.813	31.577
RCR_S_133	179.747	184.668	25.894	1.02738	15083.3	2292.61	60.6219		0.0336632	4.29465	0.934738	5.17677	0.102515	1.75602	0.303056	9.7547	1.75602	0.0661306	4.86984	669.204	28.2694	40.5785	810.544	101.864	103.266	670.124	25.3955	26.5659	629.129	10.5257	13.3405	6.11759	3.88913	165.221	6.22804	843.758	1.18493	0.873551	25.6935	0.396694	3.35274	5.79799	2.1382	22.4816	6.83755	73.3998	26.9851	122.572	27.1173
RCR_S_107	272.694	162.856	35.5854	0.597211	10959.4	2584.9	175.29		0.0329951	7.97889	0.994793	6.68269	0.103578	4.34017	0.638143	9.65454	4.34017	0.0696567	5.08146	656.136	51.5118	58.979	918.246	104.504	105.824	701.163	33.8389	34.7766	635.345	26.2597	27.5209	9.38696	5.75761	2193.82	30.5671	1718.56	1.21353	31.2041	81.3967	9.86797	42.3962	16.5547	0.997241	41.6956	13.1733	143.799	54.6049	240.083	47.4054
RCR_S_125	98.1007	75.7286	13.0937	0.771948	8682.15	8682.15	371.542		0.0302068	4.93336	0.887015	7.91497	0.103824	3.44421	0.423099	9.6317	3.44421	0.061963	7.1263	601.504	29.2372	39.2992	672.833	152.433	153.416	644.764	37.7776	38.5281	636.779	20.8836	22.4585	1.23843	6.63138	537.082	2.47425	3286.37	3.10376		20.7105	0.062616	2.23893	7.81961	2.03431	62.3138	23.0758	304.026	118.429	539.8	113.235
RCR_S_83	140.448	105.012	19.0579	0.747694	13219.4	470.936	10.3921		0.0322331	5.0577	0.88089	6.40015	0.105105	4.27328	0.655689	9.51426	4.27328	0.0607849	4.76456	641.22	31.922	42.6214	631.624	102.613	104.086	641.463	30.4353	31.3512	644.259	26.2	27.4924	-0.435845	6.27622	271.028	3.97182	1150.84	1.36357	0.026436	14.1009	0.0375344	0.959188	2.03041	0.5627	16.2567	6.21243	81.8119	35.5505	186.256	44.0082
RCR_S_84	328.456	194.834	43.8912	0.59318	32365.4	4442.62	47.1747		0.0328733	4.74561	0.911356	4.72982	0.10654	3.36177	0.690127	9.38617	3.36177	0.0620404	3.32712	653.752	30.5281	41.9549	675.482	71.1375	73.2155	657.778	22.8992	24.1601	652.621	20.8656	22.5302	0.784026	4.68963	484.251	3.34208	2000.75	3.68149	0.019645	14.4112	0.118133	2.15423	5.82254	0.409835	37.7694	14.5461	178.452	69.1407	303.394	62.7038
DH1_S_61	175.714	131.843	24.3514	0.750328	16209.6	1368.79	21.1486		0.0325713	6.09498	0.926424	5.31581	0.107189	3.85564	0.709321	9.32934	3.85564	0.0626844	3.65949	647.842	38.8598	48.2891	697.527	77.9607	79.8463	665.752	25.9571	27.08	656.4	24.0626	25.5098	1.4046	5.27646	190.746	10.9705	300.264	1.18832		12.2891	0.0931162	2.60176	3.07586	1.78075	11.3332	2.61469	29.1148	10.3312	40.5974	8.81921
RCR_S_90	203.312	11.574	24.1268	0.0569274	18738.6	1582.34	35.0082		0.0353901	23.1433	0.968837	6.32907	0.109265	4.82585	0.751745	9.15203	4.82585	0.0643083	4.09491	702.943	159.888	162.838	751.781	86.469	88.1449	687.864	31.6236	32.6007	668.48	30.6435	31.8421	2.81808	6.30929	239.384	3.00886	449.427	0.827924		0.409385	0.0400704	0.257002	1.1696	0.147508	10.3922	4.28102	50.4502	15.7811	52.8206	8.68772
RCR_S_115	62.6311	8.68114	7.84144	0.138607	5653.27	257.787	3.23894		0.0496558	13.1868	0.990794	6.02787	0.111387	3.02585	0.483966	8.97772	3.02585	0.0645132	5.2134	979.527	126.088	133.04	758.519	109.966	111.287	699.125	30.4615	31.4944	680.797	19.5494	21.4327	2.62164	5.08143	200.251	14.7556	559.78	1.39837		2.62284	0.038767	0.872224	2.44274	0.454214	13.193	4.33264	50.8065	19.5018	78.1213	15.0759
RCR_S_111	204.579	22.8586	26.6681	0.111735	20236.5	659.126	29.9023		0.0377084	10.8379	1.1525	9.98739	0.117316	4.15755	0.408371	8.52396	4.15755	0.0712493	9.0809	748.149	79.6013	86.0389	964.551	185.424	186.161	778.422	54.2975	54.9804	715.098	28.1409	29.6224	8.13491	7.35731	161.878	2.43347	71.3903	0.244797		0.496446			0.317932	0.29703	1.81217	0.578134	6.99919	2.067	8.44344	2.03382
DH1_S_69	175.156	368.446	35.6401	2.10353	17304.5	2415.56	44.7863		0.0365059	3.89226	1.10028	4.94546	0.118385	4.11353	0.815661	8.44703	4.11353	0.0674073	2.74526	724.714	27.7081	42.2997	850.38	57.062	59.4929	753.487	26.3065	27.6193	721.26	28.0697	29.5613	4.277	5.00466	321.378	5.07461	2308.97	4.32284	0.107108	31.5837	0.439479	6.2134	12.261	5.55414	54.818	16.9831	194.216	72.413	330.556	76.0632
DH1_S_31	284.199	54.7936	39.3724	0.1928	28521.9	1744.51	41.3503		0.0458067	6.7078	1.13764	4.78816	0.120543	3.51846	0.715387	8.29581	3.51846	0.0684483	3.24761	905.273	59.3841	71.6507	882.172	67.166	69.2199	771.39	25.8743	27.25	733.687	24.3996	26.1573	4.88763	4.49256	422.87	7.0149	1253.84	3.86553	0.083543	3.75996	0.101842	1.37171	2.55827	0.248733	19.1205	7.5153	99.6119	40.3978	189.735	41.3181
DH1_S_34	262.112	79.4572	39.9232	0.303142	28968.1	28968.1	1028.34		0.0452977	5.19824	1.25518	3.37486	0.128479	2.13532	0.587271	7.7834	2.13532	0.0708555	2.61344	895.432	45.5307	60.3714	953.233	53.4569	55.9613	825.739	19.0726	21.0654	779.181	15.6718	18.5803	5.63841	2.89005	515.714	5.5861	1823.84	3.93015	0.0212747	6.89095	0.0566366	1.18933	3.96054	0.209086	28.131	11.1652	151.668	63.7776	297.257	65.1899
RCR_S_121	1241.2	554.046	221.909	0.446379	156512	156512	7930.22		0.0463665	2.43592	1.32261	4.53466	0.13925	3.67755	0.791286	7.18134	3.67755	0.0688867	2.65307	916.089	21.8171	45.3128	895.33	54.7578	57.2567	855.654	26.2198	27.9205	840.419	28.9769	31.1425	1.78054	4.53068	980.942	6.14032	3620.74	5.32925	0.0416344	9.41633	0.467276	7.34098	15.8617	0.920677	94.4202	34.1596	356.506	124.983	530.887	100.653
RCR_S_113	1527.82	200.328	257.406	0.13112	185071	12171.8	687.77		0.0518894	6.35472	1.43687	4.31182	0.139942	4.23402	0.963964	7.1458	4.23402	0.0744675	0.815405	1022.49	63.3603	77.2966	1054.18	16.4241	23.1576	904.416	25.8152	27.693	844.336	33.5071	35.4562	6.64287	4.56363	175.377	14.0391	785.591	12.7509	0.25566	14.7826	0.417294	3.51816	3.09601	1.05837	12.8438	5.19276	63.2905	25.6237	125.716	29.9717
RCR_S_72	786.487	48.651	125.053	0.0618586	98743.7	15008.9	166.643		0.0411196	6.18822	1.36822	6.409	0.141017	6.12459	0.947267	7.09133	6.12459	0.070369	1.88805	814.482	49.3999	61.0023	939.138	38.7033	42.1138	875.4	37.5971	38.783	850.413	48.795	50.0639	2.85437	6.96258	171.914	6.2047	209.793	0.224328		0.998556		0.560301	2.8875		14.2538	3.8204	31.3093	6.4322	17.0537	2.471
DH1_S_47	756.472	1372.66	182.525	1.81455	95552.3	4084.83	32.5271		0.0445996	2.05586	1.44607	3.37639	0.144418	3.08383	0.881885	6.92433	3.08383	0.0726215	1.37477	881.93	17.7413	42.7847	1003.43	27.9044	32.3826	908.242	20.2676	22.472	869.599	25.0869	27.5502	4.25475	3.49204	490.649	12.1647	2910.84	5.91314	0.355438	51.9314	1.43582	20.5095	33.4296	1.73187	119.288	32.1779	313.888	105.856	405.599	74.4517
DH1_S_28	655.325	56.779	112.19	0.0866425	83013.3	6615.4	49.815		0.0426714	10.4495	1.59259	5.9927	0.151102	5.64194	0.931786	6.61803	5.64194	0.0764417	2.02013	844.586	86.4368	94.2265	1106.66	40.3727	43.4911	967.311	37.3785	38.7001	907.14	47.7424	49.1681	6.2204	6.12306	478.482	6.66636	1246.89	1.12408	0.085093	5.05485	0.082375	0.678617	2.16919	0.440611	13.856	6.63221	96.7602	43.355	217.992	49.3847
RCR_S_73	273.669	348.308	63.1245	1.27273	40176.7	3351.35	76.8797		0.0462481	3.18165	1.56457	4.73396	0.158437	4.32054	0.896634	6.31166	4.32054	0.0716204	1.93476	913.802	28.4266	49.1123	975.184	39.4409	42.7572	956.278	29.3248	30.9417	948.085	38.0926	39.9682	0.856723	5.01108	305.422	4.65607	1323.43	2.7103	0.0350163	34.0533	0.160379	3.98358	4.57608	1.52845	29.3145	9.25389	107.757	43.7652	210.237	49.1656
RCR_S_136	541.436	86.8883	101.263	0.160477	79085.9	79085.9	1247.03		0.0510304	4.47298	1.64342	4.18691	0.162025	3.97329	0.929221	6.1719	3.97329	0.0735643	1.32029	1005.98	43.8958	61.7127	1029.54	26.6929	31.3245	987.028	26.4305	28.3428	968.018	35.7136	37.8775	1.92594	4.47092	83.5972	5.55553	337.174	2.24428		4.35468	0.0241112	0.340216	0.859878	0.250614	6.88915	2.5216	28.516	10.0669	46.7899	9.88427
DH1_S_37	335.476	390.456	79.8986	1.16389	48852.7	1452.83	35.0973		0.050624	2.81432	1.70396	2.85341	0.16416	2.08082	0.674081	6.09162	2.08082	0.0752819	1.95246	998.163	27.4091	51.8875	1076.03	39.1989	42.4331	1010.02	18.258	20.9086	979.853	18.915	22.6533	2.98664	2.56566	208.419	13.4321	1028.85	0.688372	0.0911402	47.2531	0.436252	8.10342	11.018	4.32122	42.7169	12.1956	114.159	37.3713	143.065	27.5777
DH1_S_68	1323.62	109.496	259.329	0.0827245	198128	198128	6491.2		0.0602676	7.39203	1.70333	4.15928	0.164223	3.99455	0.940659	6.08929	3.99455	0.0752255	1.15897	1182.84	84.9268	99.3694	1074.51	23.2737	28.392	1009.78	26.6102	28.6852	980.201	36.3231	38.6902	2.92958	4.41393	366.292	6.86656	1218.81	4.7369	0.327615	39.477	0.431495	2.467	2.33142	0.612856	12.4186	5.56861	85.6025	36.3036	212.024	56.8773
DH1_S_15	458.956	211.534	93.4079	0.460901	62819.6	3551.08	73.1809		0.0503504	3.60637	1.63335	4.22436	0.164715	3.82089	0.884215	6.0711	3.82089	0.0719192	1.80166	992.897	34.9423	56.222	983.646	36.6804	40.2088	983.15	26.6048	28.4409	982.925	34.8334	37.0235	0.0229317	4.45787	121.993	4.31093	375.271	2.48342		25.7539	0.0114199	0.131433	0.978779	0.112643	4.09871	1.62375	22.0567	10.0128	61.404	17.5278
RCR_S_91	418.589	4.02261	76.3579	0.00960992	61886.5	3067.39	83.857		0.0415733	36.2217	1.69325	3.03807	0.166015	2.60539	0.816119	6.02355	2.60539	0.0739728	1.56264	823.288	292.217	294.43	1040.73	31.5392	35.5259	1005.99	19.3942	21.9384	990.117	23.913	27.091	1.57772	3.04151	590.677	7.56887	1290.59	0.724842		0.218135		0.29562	0.776986	0.285604	13.7327	7.04501	111.872	44.5971	189.988	38.658
DH1_S_27	641.342	167.371	127.717	0.260969	94781.7	12043.1	224.966		0.0505864	2.66434	1.72015	2.37866	0.167202	2.22344	0.872846	5.9808	2.22344	0.0746147	0.845188	997.439	25.9301	51.1976	1058.16	17.0138	23.5539	1016.08	15.2734	18.4552	996.675	20.5323	24.2427	1.90988	2.50148	225.075	5.4825	773.058	18.6128		36.6462		0.268083	1.21786	0.111398	7.66063	3.38216	50.4623	23.9226	133.561	35.4838
RCR_S_85	722.799	111.328	144.6	0.154023	115082	115082	2769.83		0.0549916	4.00095	1.79966	4.25899	0.170518	3.78646	0.868704	5.86448	3.78646	0.0765454	1.94981	1082.01	42.1525	63.2079	1109.37	38.9516	42.1796	1045.34	27.7985	29.7708	1014.97	35.5585	37.9681	2.90528	4.2706	89.0885	11.3344	202.633	0.245114		1.39523			0.317683	0.064037	2.77901	1.05769	13.6226	6.38368	30.157	7.80318
RCR_S_108	87.3957	75.0353	20.0599	0.85857	12483.5	2862.36	100.761		0.0528226	5.19276	1.74969	4.93808	0.171379	4.23619	0.842164	5.83501	4.23619	0.0740461	2.53758	1040.41	52.6593	69.3394	1042.73	51.2012	53.7488	1027.05	31.9055	33.5087	1019.71	39.9535	41.9681	0.714934	4.96448	186.803	5.42838	906.381	1.87612		27.6923	0.312254	3.66095	5.3457	1.73045	22.3365	7.28522	82.0294	31.2521	139.678	30.747
RCR_S_134	145.512	191.478	37.5729	1.31589	22391.6	19557.5	419.929		0.0522972	4.16932	1.81319	4.18489	0.175378	2.91763	0.670263	5.70198	2.91763	0.0749836	3.00013	1030.33	41.881	61.048	1068.05	60.3046	62.4679	1050.23	27.3879	29.3056	1041.67	28.0638	31.0099	0.814565	3.71897	184.397	7.33085	933.156	4.18463	0.137445	84.1664	1.45237	19.1586	21.2814	9.03776	60.9305	12.7832	107.814	31.0345	114.08	21.9421
RCR_S_103	355.763	36.1876	69.8049	0.101718	53825.1	1136.29	52.2785		0.0473563	5.75344	1.75128	3.79382	0.1754	2.85821	0.723106	5.70127	2.85821	0.0724146	2.49474	935.2	52.5803	66.4855	997.6	50.6831	53.2898	1027.64	24.5204	26.6226	1041.79	27.4951	30.5512	-1.37769	3.60695	176.503	8.98313	241.552	0.688361		0.685231	0.0198628	0.636979	3.09953	0.0567389	21.6412	5.16918	37.5271	7.48337	19.0451	2.7882
DH1_S_41	27.4443	24.4133	6.46761	0.889559	4082.52	183.712	3.53855		0.0511391	6.4749	1.72897	10.4467	0.178163	4.57115	0.43071	5.61285	4.57115	0.0703832	9.3935	1008.07	63.6705	77.6523	939.575	192.543	193.256	1019.37	67.2043	67.9606	1056.93	44.561	46.456	-3.68488	8.11394	166.434	26.2399	767.826	1.22068		39.0623	0.134596	3.16537	4.37411	1.25167	22.6654	6.67158	75.924	26.7886	114.763	23.651
RCR_S_99	560.317	42.9811	114.476	0.0767084	85135.5	12706	123.097		0.0631596	5.8598	1.86674	2.01289	0.179979	1.61949	0.703851	5.55621	1.61949	0.0752248	1.19541	1237.9	70.3617	88.3909	1074.52	24.0051	29.0002	1069.38	13.309	17.0813	1066.86	15.9237	21.062	0.235438	1.9388	127.136	3.29721	634.565	7.13387	0.0719396	7.58735	0.163964	1.53952	2.13403	0.530835	12.628	4.32612	57.1234	20.5203	87.8963	18.0358
RCR_S_98	48.8825	23.7969	10.7667	0.486818	7409.47	461.444	5.82207		0.0540579	3.35118	1.90494	6.20366	0.180406	4.3006	0.680934	5.54305	4.3006	0.0765826	4.47104	1064.12	34.738	57.8303	1110.37	89.3043	90.7588	1082.82	41.3069	42.6272	1069.19	42.3708	44.4319	1.25845	5.43139	220.143	17.0056	527.218	1.57314		19.8048	0.0483684	0.836629	1.70403	0.632845	11.1694	3.94772	49.2884	17.5008	76.7695	16.5159
RCR_S_128	117.606	37.7735	25.1394	0.321188	17971.6	1982.66	40.6078		0.0551958	8.80871	1.95447	4.53337	0.181309	3.08968	0.658078	5.51545	3.08968	0.0781825	3.31744	1085.93	93.1317	104.229	1151.51	65.8624	67.8006	1099.98	30.451	32.2708	1074.12	30.5694	33.4334	2.35134	3.87693	179.99	1.77365	539.163	2.11497		6.48393	0.020177	0.206248	1.17976	0.0321387	8.48373	3.04079	43.6703	16.9877	82.6715	18.9293
RCR_S_100	226.656	177.272	53.9037	0.782116	34343.3	5220.15	177.974		0.0518135	4.16944	1.85736	4.50067	0.181976	3.59978	0.779569	5.49522	3.59978	0.0740254	2.70141	1021.03	41.514	60.7512	1042.15	54.512	56.9115	1066.05	29.7056	31.5148	1077.76	35.7273	38.2388	-1.09863	4.37811	268.653	3.72751	737.497	6.23794	0.0728375	17.6256	0.0282313	0.51683	0.724478		7.18012	3.2247	49.3182	21.9983	121.796	31.4309
DH1_S_44	92.5859	55.6721	23.7474	0.601302	14790.7	300.199	16.8161		0.0938703	38.2561	2.43234	20.6249	0.182102	5.87663	0.282227	5.49142	5.87663	0.0968742	19.7699	1813.48	663.553	668.156	1564.79	370.593	370.903	1252.21	148.407	148.841	1078.45	58.3589	59.8877	13.8767	11.2206	249.79	25.955	971.652	2.86324	0.0277644	27.2016	0.266577	5.91958	6.86564	1.2385	29.3185	9.03394	97.1901	34.8781	134.531	28.6826
RCR_S_76	276.742	72.8192	60.7753	0.26313	45801.2	2900.68	63.3665		0.0653116	4.58156	2.02715	4.03512	0.184892	3.40124	0.819009	5.40858	3.40124	0.0795186	2.17113	1278.77	56.7726	79.4049	1185.1	42.8928	45.7802	1124.66	27.4371	29.5069	1093.64	34.2132	36.9067	2.75813	3.85774	350.88	16.7391	1261.96	2.69784		5.27527	0.0757071	1.03948	3.92859	0.285841	22.1739	8.44874	108.466	43.849	209.008	44.5578
DH1_S_46	254.836	105.715	58.8273	0.414834	41346.9	41346.9	798.366		0.056805	4.93657	2.04962	4.51278	0.189887	3.82331	0.828228	5.2663	3.82331	0.0782848	2.3974	1116.73	53.6327	72.6622	1154.1	47.5787	50.2178	1132.17	30.7965	32.6526	1120.76	39.332	41.7767	1.00758	4.39542	369.206	14.1063	1487.41	1.43505	0.0236086	4.24335	0.0993186	2.03844	5.93867	0.0914249	33.2682	11.2356	136.388	50.9482	227.333	45.4151
RCR_S_97	750.026	129.856	175.269	0.173135	134171	2789.43	124.501		0.0785628	3.54584	2.57309	11.7989	0.190524	10.0356	0.847784	5.24867	10.0356	0.0979499	6.20486	1528.63	52.2039	83.8976	1585.47	115.997	116.982	1293.02	86.2746	87.1079	1124.22	103.532	104.578	13.0552	9.88769	354.791	9.53603	665.039	0.664602	0.224115	54.6015	0.94764	9.02593	13.0016	1.78008	50.3293	11.1735	84.1009	21.6045	82.8235	16.5905
DH1_S_48	85.5882	34.6834	19.6411	0.405236	13968.9	1647.3	45.6452		0.0569939	5.33852	2.03546	5.1797	0.191381	3.42246	0.642263	5.22519	3.42246	0.0771372	3.88793	1120.34	58.182	76.17	1124.75	77.4929	79.1549	1127.44	35.2673	36.8666	1128.85	35.4409	38.1133	-0.124608	4.43741	255.361	12.375	833.017	2.91679		6.28912	0.0176765	0.913287	2.67534	0.117776	15.6814	5.82112	73.1977	27.3615	131.253	26.3828
DH1_S_39	280.624	98.3003	64.5084	0.350292	45371.6	4939.29	62.6811		0.0578663	3.29789	2.08455	3.76708	0.191591	3.26482	0.840041	5.21944	3.26482	0.0789105	1.87932	1137.01	36.4622	61.8808	1169.9	37.2103	40.5143	1143.73	25.8496	28.0602	1129.99	33.8396	36.6967	1.20155	3.70675	138.826	3.50705	2520.72	3.35258		13.0684	0.411124	7.92292	14.2021	0.608128	67.9191	22.6453	249.765	91.1966	389.337	72.6314
DH1_S_70	125.451	46.9625	29.3586	0.37435	19965.7	22762.6	683.459		0.0577444	6.13734	2.10519	5.30403	0.196375	4.99439	0.929242	5.09229	4.99439	0.0777506	1.78574	1134.68	67.7208	83.9018	1140.51	35.5102	38.991	1150.51	36.5123	38.104	1155.82	52.847	54.7721	-0.461813	5.59141	179.576	4.60342	998.047	13.6239		14.2753	0.118306	1.4186	3.6997	0.175297	19.6876	7.58631	95.7118	35.4649	156.158	32.2573
RCR_S_110	191.489	87.9583	46.9287	0.459339	32367.2	2355.22	34.5323		0.0596878	4.96052	2.21324	4.39996	0.199736	3.75723	0.834059	5.00661	3.75723	0.0803659	2.28974	1171.79	56.4738	75.8434	1205.96	45.1005	47.8421	1185.24	30.7726	32.7312	1173.9	40.3233	42.9326	0.956405	4.26463	230.517	4.21111	1018.69	2.52958		7.71318	0.0302402	1.58756	4.13703	0.0823262	20.5576	6.87277	81.8431	32.4178	149.117	31.4522
DH1_S_16	226.954	29.6871	51.2716	0.130807	34554.5	34554.5	2016.39		0.0603773	11.1376	2.17882	6.69163	0.200149	6.2695	0.929116	4.99628	6.2695	0.0789527	2.33907	1184.93	128.179	138.441	1170.95	46.3066	48.9982	1174.3	46.5712	47.8562	1176.12	67.4015	68.9699	-0.154933	6.98005	141.102	3.02622	497.485	4.44984	0.063486	5.00971	0.0378402	0.55251	0.759307	0.0607727	6.73188	2.67511	39.1543	17.2874	95.07	25.4725
DH1_S_55	224.998	169.249	61.1803	0.752224	39862.5	2291.24	38.4799		0.062192	5.04753	2.41211	4.21284	0.205028	2.66096	0.602398	4.87739	2.66096	0.0853263	3.26608	1219.49	59.7342	80.0662	1322.95	63.2678	65.1826	1246.21	30.2398	32.323	1202.27	29.1858	32.8218	3.52569	3.31135	277.55	32.995	1342.44	6.40691	0.210841	21.8342	0.236529	4.08944	5.53111	0.595364	31.7122	10.8249	123.263	47.009	201.622	41.816
DH1_S_7	243.901	90.2698	61.1604	0.370109	41706.3	7961.6	63.087		0.0571095	4.2201	2.40542	4.52687	0.209344	4.47119	0.971537	4.77683	4.47119	0.0833354	0.707821	1122.55	46.0812	67.8163	1277.06	13.8005	20.9564	1244.22	32.4675	34.3994	1225.32	49.8944	52.1604	1.51876	4.76287	533.716	9.99778	1798.93	0.979905		2.45906	0.119961	2.26958	6.13105	0.187228	39.9905	13.1905	161.976	61.6423	273.707	54.8428
RCR_S_117	208.383	78.8202	55.5906	0.378247	38346.4	3451.16	113.013		0.0677589	4.03861	2.53515	4.29573	0.220106	3.9926	0.91028	4.54326	3.9926	0.0835354	1.58508	1325.15	51.8009	76.9592	1281.75	30.8837	34.6874	1282.18	31.2797	33.3759	1282.44	46.431	49.119	-0.0198604	4.36662	233.993	10.7578	1781.74	3.0076	1.42285	9.31533	0.628123	5.50179	7.43661	0.102521	43.3382	14.2274	175.114	63.6511	275.921	51.7333
RCR_S_124	77.3269	30.1085	21.4442	0.389367	11675.1	424.772	20.6478		0.0800465	7.5764	2.81633	6.51311	0.22566	4.8873	0.740058	4.43144	4.8873	0.0905163	4.30521	1556.42	113.495	131.486	1436.45	82.0988	83.5415	1359.89	48.804	50.2316	1311.72	58.006	60.2231	3.54265	5.49341	241.847	21.3262	751.021	1.31148	0.17976	9.65278	0.19569	2.13772	2.94545	0.40309	13.0298	4.5101	61.4946	24.51	112.84	24.1584
DH1_S_62	410.65	544.41	141.997	1.32573	81171	81171	2860.35		0.0666339	2.88897	2.78765	4.06153	0.22997	3.35819	0.802795	4.3484	3.35819	0.0879156	2.28441	1303.84	36.4783	67.4729	1380.64	43.8977	46.5738	1352.23	30.352	32.6551	1334.34	40.4762	43.8241	1.32304	3.72365	409.569	5.19576	3426.15	2.60101	0.374134	27.389	0.360811	6.23557	13.2983	2.3368	74.0817	24.5074	298.426	118.232	535.4	114.863
RCR_S_140	175.446	146.802	55.5248	0.836735	35842.7	1145.61	13.0817		0.0696875	4.17857	2.88606	3.77607	0.23466	3.32928	0.855529	4.26149	3.32928	0.0892003	1.78174	1361.62	55.0222	80.0646	1408.48	34.1071	37.4729	1378.28	28.4751	30.927	1358.87	40.7905	44.1547	1.40782	3.59274	373.334	2.93794	1793.1	2.76301		48.8781	0.157522	2.43441	7.14084	1.48739	34.003	11.5898	145.43	60.9651	282.627	60.9918
RCR_S_105	312.421	96.4787	89.7577	0.30881	62872.9	6434.92	284.962		0.0716366	4.05505	3.03153	3.05646	0.237661	2.52658	0.784118	4.20767	2.52658	0.092513	1.71998	1398.42	54.7893	81.3521	1477.93	32.6161	36.0548	1415.59	23.3368	26.3726	1374.53	31.2757	35.696	2.90103	2.72831	119.014	4.30937	567.985	6.27213	0.175035	6.49456	0.0457124	0.307667	0.608866	0.20305	4.13241	1.77843	29.6648	15.3694	89.3247	22.1683
DH1_S_22	254.055	165.923	79.5407	0.6531	39953.7	2653.22	276.442		0.0668425	8.7824	3.0665	8.24234	0.244056	7.22444	0.871006	4.09743	7.22444	0.0911283	3.96783	1307.79	111.219	125.201	1449.28	75.5338	77.0882	1424.36	63.1107	64.2684	1407.75	91.3633	92.9776	1.1665	7.76661	153.793	6.11035	1971.31	0.345815	0.101118	10.3306	0.131741	3.7335	8.37386	2.49006	47.9663	16.229	185.454	72.1866	288.42	58.8645
DH1_S_2	206.628	23.785	58.6424	0.11511	40541.8	18486.4	197.972		0.104089	6.99417	3.23157	4.15039	0.245161	2.89302	0.669806	4.07895	2.89302	0.0956007	2.97593	2001.42	133.275	159.106	1539.92	55.9685	57.9988	1464.76	32.1833	34.4466	1413.47	36.7194	40.5826	3.50175	3.28324	248.231	3.08164	974.061	1.51857		2.85801	0.0392232	1.4746	3.40965	0.624109	18.7313	6.62189	87.6322	33.9853	155.442	34.0724
RCR_S_106	365.338	284.204	125.675	0.77792	78700.1	5184.49	112.766		0.0818985	2.71569	3.44772	3.79743	0.247654	3.56102	0.913461	4.03789	3.56102	0.100968	1.31896	1591.05	41.551	79.7633	1641.99	24.4776	28.7285	1515.35	29.8892	32.4858	1426.37	45.5663	48.9573	5.8721	3.53397	431.097	20.7056	1778.29	5.18969	0.855917	76.8558	0.758539	6.17508	7.49763	1.97849	39.4695	12.3669	157.064	60.0754	267.678	58.8077
DH1_S_21	1100.24	325.415	367.188	0.295768	261266	202374	3351.52		0.0810143	3.48354	3.58334	3.41157	0.252621	3.29443	0.936541	3.95849	3.29443	0.102876	0.886307	1574.52	52.7671	86.6923	1676.66	16.3755	22.1726	1545.85	27.0826	30.2704	1451.98	42.8301	47.0546	6.07214	3.22249	102.307	3.64503	439.446	5.73142		35.7325	0.0198204	0.450229	0.806431	0.137064	4.26667	1.5108	23.9485	12.0697	72.5174	20.633
RCR_S_116	81.5127	53.0054	29.0807	0.650272	18943.5	1363.92	21.0386		0.0825013	8.09554	3.66238	5.42374	0.275587	3.90226	0.703958	3.62861	3.90226	0.0963836	3.76686	1602.3	124.707	142.218	1555.25	70.7003	72.3185	1563.21	43.2598	45.079	1569.1	54.348	57.5871	-0.376883	4.45012	318.347	17.8973	831.284	1.50585		15.8242	0.022625	0.592441	1.81442	0.42712	13.7046	4.9553	66.5569	27.5706	124.907	27.9218
RCR_S_120	477.92	91.9378	165.573	0.192371	122999	7190.65	198.267		0.0844137	5.52231	4.27943	4.26023	0.284304	4.0615	0.934363	3.51736	4.0615	0.10917	1.28602	1637.98	86.8862	111.438	1785.6	23.4385	27.7059	1689.41	35.0641	37.5773	1613	57.9588	61.4348	4.5229	3.9619	304.968	6.79454	978.021	6.62677		8.94962	0.0487165	0.597574	1.09198	0.0740576	12.8164	5.59284	76.7113	34.0518	157.582	35.5298
DH1_S_33	95.2616	75.5815	36.5289	0.79341	23006.1	23006.1	797.583		0.0805661	6.13672	4.15447	4.95895	0.287865	4.03754	0.797835	3.47385	4.03754	0.104671	2.87915	1566.14	92.4805	114.921	1708.52	52.9816	55.0348	1665.09	40.5837	42.5929	1630.85	58.1773	61.3732	2.0562	4.2316	266.833	5.00886	622.367	2.25431		16.7192	0.0748136	1.05195	2.23425	0.297219	11.1327	4.18484	52.0111	21.7771	104.92	22.944
DH1_S_66	46.7834	43.1075	18.1061	0.921428	11460	11460	258.934		0.077144	7.13578	3.85808	5.86042	0.287901	4.32396	0.724885	3.47342	4.32396	0.0971913	3.95575	1502.03	103.296	122.06	1570.9	74.0924	75.6289	1604.96	47.2569	48.9415	1631.03	62.3103	65.299	-1.6244	4.90167	229.161	24.548	526.384	0.944783		24.4127	0.0689359	1.70015	2.96163	0.334642	13.292	4.11363	48.8184	18.3024	80.9336	17.2523
DH1_S_36	74.7567	71.0211	31.8828	0.95003	18329.3	296.385	6.23099		0.10245	4.27133	4.93158	5.32599	0.292422	4.42169	0.816304	3.41972	4.42169	0.122314	2.96897	1971.39	80.2286	116.872	1990.26	52.7996	54.7261	1807.68	44.962	46.8933	1653.62	64.4929	67.4504	8.52232	4.23151	322.33	19.4187	1659.59	1.1634		14.0454	0.316559	4.105	9.41449	2.27651	46.5705	14.1587	164.117	60.5532	254.446	51.2805
DH1_S_17	253.531	163.099	97.3836	0.643311	55220.2	4391.9	240.427		0.0867745	5.13497	4.12097	5.59997	0.292564	5.28034	0.931855	3.41805	5.28034	0.102159	1.86486	1681.94	82.871	110.661	1663.7	34.5125	37.6205	1658.47	45.7575	47.5724	1654.33	77.0458	79.6042	0.249558	5.39961	228.964	9.2413	825.716	3.82721	0.125671	52.8779	0.18064	2.01757	3.06687	0.715795	15.4683	5.18181	66.7708	28.129	137.294	32.475
RCR_S_75	686.184	209.855	261.563	0.305829	201269	9560.19	333.631		0.0904039	4.61232	4.50689	4.8724	0.293811	4.76415	0.963653	3.40355	4.76415	0.111252	1.02136	1749.32	77.2914	107.761	1819.97	18.5364	23.6572	1732.24	40.4896	42.8218	1660.54	69.7429	72.9827	4.1391	4.60766	229.491	5.59875	1143.04	3.20207	1.44777	61.3111	2.27005	16.6311	11.9089	3.38166	34.3529	10.2477	106.506	37.9067	167.337	39.1254
DH1_S_59	128.777	45.4263	48.9547	0.352751	35298.6	34492.6	499.09		0.0869483	6.57733	4.64682	4.8479	0.312366	4.52924	0.91934	3.20137	4.52924	0.107892	1.72862	1685.17	106.344	128.831	1764.14	31.5884	34.882	1757.72	40.5075	42.6285	1752.34	69.4949	72.5934	0.306211	4.57276	184.669	12.2128	889.71	2.62056		11.2145	0.101418	2.42934	5.831	0.231101	25.8724	7.94376	86.6263	31.1075	129.86	25.81
RCR_S_77	152.336	99.6898	66.8574	0.654405	44749.8	3566.14	64.5726		0.100677	3.82741	5.41349	7.94059	0.328675	7.80746	0.977944	3.04251	7.80746	0.119456	1.44791	1938.86	70.7601	108.926	1948.1	25.877	29.6505	1886.99	68.0558	69.4172	1831.96	124.502	126.419	2.91642	7.46942	136.266	4.96546	510.497	1.10506	0.0297631	26.4854	0.109375	1.44553	2.84951	0.708019	15.3966	3.96062	42.5821	16.5974	72.5698	17.34
RCR_S_93	195.767	58.1364	78.647	0.296968	57270	6421.64	119.874		0.0969965	3.54918	5.13541	3.95863	0.328754	3.54385	0.871828	3.04179	3.54385	0.113293	1.76405	1871.16	63.4294	101.924	1852.9	31.8871	35.0892	1841.98	33.6439	36.3019	1832.34	56.5223	60.6841	0.523567	3.56613	265.173	5.78725	826.324	3.25125		10.3868	0.0415092	0.53431	1.54589	0.194758	11.7505	5.15795	63.784	28.006	128.696	28.5173
RCR_S_82	99.9322	85.891	44.3947	0.859493	28225.8	28225.8	417.456		0.0818746	11.2562	5.45005	5.15792	0.331764	4.10516	0.7804	3.01419	4.10516	0.119143	3.1228	1590.6	172.178	185.287	1943.42	55.8413	57.6892	1892.76	44.253	46.3049	1846.93	65.925	69.4832	2.42171	4.16366	381.848	4.04943	1026.54	0.870623	0.202334	13.2755	0.251369	6.37538	6.56835	0.999041	19.9743	6.76833	88.6349	36.0058	155.817	35.1768
DH1_S_10	166.458	79.1815	72.5395	0.475686	45998.4	6050.58	174.968		0.103229	3.29486	5.99334	4.29459	0.337774	3.89984	0.888549	2.96056	3.89984	0.128689	1.79852	1985.66	62.3138	106.307	2080.15	31.6564	34.7109	1974.88	37.3711	39.8413	1875.95	63.4759	67.2543	5.00926	3.68266	204.182	17.4771	419.048	2.22059		13.2504	0.0158434	0.532607	1.3221	0.323331	7.5637	2.95516	35.4149	13.9562	62.2438	12.9383
DH1_S_24	34.478	28.9609	15.9887	0.839982	9503.09	520.003	16.8376		0.0957593	6.08307	5.54	6.26273	0.343353	4.8751	0.767708	2.91245	4.8751	0.117022	3.93132	1848.35	107.449	134.058	1911.23	70.5673	72.0464	1906.83	53.8674	55.5381	1902.78	80.3253	83.3377	0.212146	5.06872	124.541	10.403	233.858	0.560785		15.1906	0.018247	0.435571	1.23546	0.272514	5.82581	2.11052	21.1615	7.83964	33.4755	7.46914
DH1_S_4	261.506	213.654	126.01	0.817014	67611.9	5793.15	105.046		0.0995744	2.75032	6.37987	3.32596	0.345124	2.99764	0.868478	2.89751	2.99764	0.134071	1.44088	1918.6	50.3406	97.4554	2151.97	25.1582	28.8511	2029.5	29.1951	32.3859	1911.27	49.5805	54.5607	5.82553	2.79347	209.118	6.47369	1186.15	1.98383		30.7419	0.102737	2.59914	4.92228	1.29301	27.0963	8.6897	99.6857	40.2379	170.831	38.3139
DH1_S_49	252.794	151.137	116.75	0.597864	80616.5	8250.84	251.919		0.0988231	3.20271	6.19644	3.503	0.346546	3.37389	0.935418	2.88562	3.37389	0.129682	0.942283	1904.79	58.2185	100.549	2093.66	16.5603	21.8323	2003.95	30.6263	33.7051	1918.08	55.9743	60.5471	4.28462	3.15306	175.464	5.29718	699.06	3.20967		25.477	0.0285294	1.29613	2.45617	0.247115	13.6379	4.38632	55.8874	22.9916	113.319	24.398
RCR_S_130	288.482	245.177	139.54	0.849888	87127.3	24000.7	1290.78		0.0988532	4.59581	5.51981	4.9324	0.347427	4.82373	0.964155	2.8783	4.82373	0.115228	1.02967	1905.34	83.5653	116.002	1883.45	18.5442	23.6026	1903.69	42.4012	44.642	1922.3	80.1788	83.5241	-0.977726	4.77466	261.701	6.9904	923.697	5.9258		35.4017	0.174395	4.06864	6.1134	1.26799	25.3984	7.34914	84.0419	31.0616	136.477	27.8745
DH1_S_26	215.894	258.586	116.226	1.19774	66800.7	4237.31	77.8682		0.105471	3.04331	6.20472	3.28155	0.357779	2.94298	0.862929	2.79502	2.94298	0.125778	1.45171	2026.7	58.6871	105.348	2039.77	25.6701	29.3883	2005.11	28.6956	31.9223	1971.64	49.991	55.2111	1.66959	2.8629	203.121	7.97622	564.35	3.19805		29.1483	0.0996872	1.89103	3.15572	0.515484	16.2285	5.04677	51.7124	19.2202	74.4786	14.6156
RCR_S_127	266.295	65.2577	120.401	0.245058	79646	21790.1	595.353		0.117268	5.42831	7.11719	6.56821	0.360098	3.90953	0.582423	2.77702	3.90953	0.143346	5.27796	2241.26	115.16	148.603	2268.03	90.9976	92.0648	2126.2	58.4763	60.2298	1982.64	66.7258	70.8933	6.75187	4.05288	291.371	14.6598	968.116	0.966299	0.382084	51.4178	0.6975	7.14258	8.47191	3.19799	27.5149	8.84332	92.7246	31.1965	131.503	28.2747
DH1_S_30	181.017	125.91	91.426	0.695574	58593.3	1473.43	41.1021		0.105035	3.69242	6.87277	1.63168	0.373902	1.21285	0.577858	2.6745	1.21285	0.133313	1.09149	2018.73	70.9385	112.27	2142.05	19.0789	23.7508	2095.15	14.4633	20.2339	2047.73	21.2779	32.179	2.26319	1.21927	131.938	3.29151	638.841	0.684254		23.4477	0.13462	1.63091	3.63392	0.857096	18.4592	5.36584	56.411	20.4484	91.524	19.7862
DH1_S_20	64.5917	89.4849	52.9211	1.38539	26449.6	672.541	32.6992		0.144769	3.69537	13.4848	4.67403	0.517115	4.13472	0.867679	1.93381	4.13472	0.189129	2.1796	2732.75	94.4559	149.662	2734.6	35.8716	38.2633	2714.22	44.1828	46.637	2686.93	90.8515	95.6151	1.00553	3.71494	183.006	7.24108	507.336	1.31237		26.4584	0.0694204	0.982541	2.68285	0.29341	12.3105	3.53779	40.9438	16.2351	74.379	15.4656
DH1_S_8	44.6012	41.162	34.1646	0.922889	18714.8	711.154	18.4492		0.14128	4.38657	14.7862	5.35871	0.526409	4.62245	0.849398	1.89966	4.62245	0.20372	2.71085	2671.05	109.756	158.239	2856.23	44.1249	46.0473	2801.58	50.9647	53.1176	2726.3	102.764	107.059	2.68706	4.07292	204.05	10.605	272.422	0.661763		14.5531	0.0683513	0.946714	2.35531	0.761671	9.04681	2.81111	28.28	9.29814	42.3749	8.87112
DH1_S_52	93.363	54.5835	77.4897	0.584637	46597.5	1300.92	132.93		0.163661	5.53237	17.3038	5.26616	0.598298	5.07419	0.951284	1.67141	5.07419	0.20976	1.40891	3063.57	157.268	202.859	2903.7	22.8369	26.3384	2951.83	50.5503	52.8136	3022.98	122.446	126.846	-2.41025	4.50364	184.858	4.20448	514.266	0.614851		5.28763	0.0341385	0.638054	1.7761	0.995443	13.8672	4.20197	45.7518	16.8749	69.4002	14.7264
RCR_S_95	664.697	206.528	48.866	0.310711	34389	1099.15	22.8933		0.0219527	4.85184	0.534905	5.22246	0.0621892	3.34701	0.622111	16.08	3.34701	0.0623822	4.00894	438.912	21.0657	28.6214	687.222	85.5501	87.2796	435.06	18.4799	19.321	388.925	12.6325	13.6528	10.6042	4.78018	1003.13	9.32135	3653.95	1.86499	0.559011	10.6179	1.51337	11.7439	16.361	2.41296	83.929	30.707	350.469	126.001	511.385	101.549
DH1_S_35	562.844	108.528	44.1154	0.192821	30666	866.745	76.8976		0.0376977	5.4344	0.634257	5.64169	0.0659487	3.09449	0.529747	15.1633	3.09449	0.0697522	4.71728	747.941	39.9032	51.9268	921.062	96.9715	98.3883	498.744	22.2323	23.0914	411.702	12.3418	13.4827	17.4524	4.43436	518.523	12.149	1058.05	1.40732	0.130488	1.79824	0.191441	5.28257	16.9005	0.997819	75.3704	18.8035	142.645	35.7901	117.803	20.633
DH1_S_9	177.628	58.7126	15.3256	0.330536	9531.58	1358.23	22.5488		0.0281547	10.6749	0.657523	7.0879	0.07225	3.18366	0.43467	13.8408	3.18366	0.0660042	6.33267	561.203	59.0839	64.2377	806.478	132.552	133.629	513.097	28.5495	29.2413	449.697	13.8289	15.0129	12.3564	5.57184	196.56	18.6804	708.997	0.492379	0.254473	4.18012	0.12963	1.73894	2.59437	0.468154	15.8616	5.17032	62.1987	24.0567	109.773	22.5774
DH1_S_54	352.302	513.195	49.0986	1.45669	27208.7	3734.8	153.43		0.0296564	1.59976	0.86152	4.4952	0.0892906	3.627	0.786763	11.1994	3.627	0.0699775	2.65549	590.704	9.31307	27.8353	927.722	54.5307	57.0086	630.952	21.124	22.3976	551.34	19.1659	20.4724	12.6178	4.21731	430.434	2003.69	2409.57	7.82351	0.416979	71.6226	0.446453	5.67343	11.2291	3.27879	58.9681	17.753	205.191	78.4436	368.408	80.7405
DH1_S_25	650.493	230.034	73.747	0.35363	41803.7	2118.02	286.726		0.0383092	5.21563	0.993802	3.83401	0.0913805	2.29531	0.561472	10.9433	2.29531	0.0788761	3.07102	759.848	38.8951	51.5549	1169.03	60.8141	62.8895	700.659	19.4044	21.0014	563.696	12.389	14.4154	19.5477	2.84445	267.939	16.0949	1133.21	1.97845	2.01804	64.849	2.90174	18.6762	9.73717	3.54907	23.3047	7.17183	84.0196	32.4033	171.167	45.0553
RCR_S_135	371.921	78.9809	47.9407	0.21236	35931.8	2118.71	78.5919		0.054856	10.6112	1.1498	3.86665	0.107738	2.6512	0.653594	9.28179	2.6512	0.0774022	2.81463	1079.41	111.534	120.827	1131.58	56.0438	58.3228	777.149	20.9985	22.725	659.597	16.6223	18.737	15.1261	3.13592	302.862	12.4735	1676.23	2.74259	1.41541	28.0115	2.84163	20.4465	20.5857	6.69999	63.256	18.5401	183.081	56.5481	226.688	47.3779
DH1_S_53	256.088	169.126	43.1079	0.660423	29969.2	857.68	31.1277		0.026679	14.7329	1.86373	8.5868	0.136048	8.43533	0.977837	7.35035	8.43533	0.0993548	1.60569	532.173	77.3813	80.9206	1612.04	29.9141	33.5012	1068.31	56.7429	57.7021	822.276	65.1202	65.9652	23.0301	7.33965	457.907	23.567	1779.72	2.49852	3.36272	323.006	5.78064	41.387	31.3395	9.75361	67.744	19.2169	187.067	57.5518	237.387	53.6694
DH1_S_12	827.369	147.312	138.973	0.178049	95688.6	5749.78	243.855		0.0743891	1.84758	1.65052	10.9033	0.137488	9.37856	0.856961	7.27339	9.37856	0.0870677	5.56092	1450.27	25.8561	68.7563	1361.99	107.136	108.264	989.752	68.9408	69.6899	830.439	73.0754	73.8781	16.0962	9.41634	370.317	5.44261	1616.94	3.08256	0.0799477	6.71399	0.0661322	1.53147	3.76052	0.372568	28.6748	10.2947	136.001	53.81	278.452	62.4281
RCR_S_138	56.0587	62.2997	16.0079	1.11133	7710.08	146.491	6.07789		0.0803881	10.0353	3.66102	10.8784	0.169926	4.24357	0.38297	5.8849	4.24357	0.156257	10.0166	1562.81	150.922	164.905	2415.56	170.051	170.608	1562.91	86.7594	87.6775	1011.71	39.733	41.7349	35.2679	4.40174	149.323	13.5967	878.865	0.541762	0.133325	37.0474	0.301696	5.63592	7.14416	1.94453	24.9559	7.1172	84.171	28.4493	120.49	25.3451
RCR_S_86	716.143	235.796	213.165	0.329258	150254	4030.29	66.7439		0.0854919	6.41328	3.69983	8.22427	0.227589	7.03833	0.850132	4.39388	7.03833	0.117904	4.25446	1658.07	102.092	124.441	1924.7	76.2455	77.6154	1571.33	65.7396	67.0513	1321.85	84.1176	85.857	15.8769	6.40656	210.54	9.21795	1025	2.20301	0.506302	19.9776	0.83993	7.03219	8.00831	2.5687	27.2405	8.15668	88.4566	32.1644	145.005	33.3443
RCR_S_118	552.503	261.945	195.213	0.474106	130652	3490.81	84.4789		0.0944271	4.03713	4.30749	2.72465	0.262476	2.22471	0.762318	3.80988	2.22471	0.119024	1.57301	1823.76	70.4035	104.607	1941.62	28.1341	31.6497	1694.79	22.4531	26.2297	1502.49	29.8166	35.4589	11.3465	2.11533	293.928	5.94487	1105.96	3.61792		15.0976	0.108621	1.29834	3.6992	0.233017	19.9219	7.44586	90.6945	34.257	153.829	33.3311
RCR_S_123	414.534	112.639	153.74	0.271725	87497.5	4433.17	143.818		0.102346	4.87212	5.272	4.08149	0.29428	3.8366	0.919018	3.39813	3.8366	0.129931	1.3925	1969.48	91.4288	123.606	2097.03	24.4634	28.3066	1864.34	34.8352	37.4906	1662.88	56.2338	59.8955	10.8059	3.44609	230.857	9.40437	1265.41	3.27466	1.0819	29.1809	0.725708	5.74062	5.99548	1.77079	21.9197	8.35645	98.2781	40.2505	184.893	42.6087
DH1_S_1	102.952	71.9891	49.3348	0.699248	26129	4964.57	149.611		0.114356	4.89974	7.66738	4.21284	0.341204	3.99842	0.929684	2.9308	3.99842	0.162979	1.32691	2188.5	101.63	138.854	2486.8	22.3653	26.1926	2192.79	37.8411	40.4046	1892.46	65.573	69.2279	13.6963	3.34075	173.775	9.44171	746.495	1.75395	0.0685474	10.3776	0.143622	2.05318	3.01296	1.44246	16.7868	6.04933	70.239	24.8021	107.147	21.2189
[truncated: 7 more columns]

## Sheet: Sheet1
Table S2. U-Pb isotope ratios and trace element concentrations by LA-ICPMS: sample data
				Composition									Corrected isotope ratios													Dates (Ma)																	Concentrations (ppm)
	U	Th	Pb		206Pb	206Pb			208Pb	±2s	207Pb	±2s	206Pb	±2s	error	238U	±2s	207Pb	±2s	208Pb	±2s	±2s-sys	207Pb	±2s	±2s-sys	207Pb	±2s	±2s-sys	206Pb	±2s	±2s-sys	disc.	±2s
Analysis	ppm	ppm	ppm	Th/U	cps	204Pb	±1s		232Th	(%)	235U	(%)	238U	(%)	corr.	206Pb	(%)	206Pb	(%)	232Th	(Ma)	(Ma)	206Pb	(Ma)	(Ma)	235U	(Ma)	(Ma)	238U	(Ma)	(Ma)	(%)	(%)	P	Ti	Y	Nb	La	Ce	Pr	Nd	Sm	Eu	Gd	Tb	Dy	Ho	Er	Tm
DH1_S_65	285.262	299.191	13.7992	1.04883	8437.46	229.014	4.38149		0.0111497	5.94274	0.243104	7.38477	0.0349547	3.66103	0.483628	28.6085	3.66103	0.0504411	6.4134	224.112	13.2448	16.6042	215.363	148.519	149.698	220.959	14.664	14.9947	221.484	7.97088	8.49812	-0.237603	7.56745	332.439	10.9174	2334.41	6.4294		47.053	0.124902	2.10958	5.49383	1.63428	32.0649	13.2831	182.872	79.2275	376.262	81.9729
DH1_S_51	280.997	445.189	15.5272	1.58432	8355.43	7298.79	276.418		0.0112007	4.48223	0.239119	7.62694	0.0358177	3.19529	0.405502	27.9191	3.19529	0.0484189	6.92534	225.131	10.0349	14.2328	119.751	163.221	164.332	217.699	14.9445	15.2599	226.857	7.12268	7.73335	-4.20675	7.86625	691.384	10.6511	3039.07	3.41543	0.0677712	55.0285	0.267288	5.76413	12.469	4.31853	71.7147	22.9746	267.132	104.16	439.689	90.1721
DH1_S_29	129.024	214.422	7.42303	1.66188	3715.62	270.86	20.2191		0.0109317	8.14663	0.255977	12.9002	0.0376242	6.47137	0.497728	26.5786	6.47137	0.0493438	11.1596	219.753	17.8055	20.3734	164.202	260.859	261.544	231.42	26.6959	26.893	238.09	15.1266	15.4502	-2.88222	13.5491	398.658	6.90409	2064.67	2.08819		49.1165	0.312357	6.17371	9.81545	3.92815	55.2043	16.877	193.603	72.4705	319.607	63.67
DH1_S_43	117.439	139.703	6.39823	1.18957	3697.52	3697.52	62.5311		0.0122766	12.2846	0.285561	18.7991	0.0379235	4.79353	0.251351	26.3689	4.79353	0.0546122	18.1777	246.625	30.1127	32.082	396.385	407.548	407.952	255.06	42.4008	42.5488	239.949	11.2906	11.7284	5.9244	16.2534	339.348	8.96813	1934.58	2.03966	0.0170236	38.357	0.143957	2.87785	6.90435	1.96785	40.6787	14.2795	164.45	66.5262	292.747	59.6327
RCR_S_89	464.887	271.938	30.3421	0.584956	20780.3	2852.42	32.3527		0.0175253	6.08217	0.391499	4.88384	0.0519608	3.93829	0.789331	19.2453	3.93829	0.0546454	2.88821	351.156	21.1735	26.2713	397.74	64.7391	67.2377	335.464	13.9521	14.6696	326.548	12.5401	13.2708	2.65763	5.51037	426.884	10.1026	2129.25	4.49548		25.2856	0.104781	2.23661	4.69584	1.06441	32.6205	12.4148	164.222	68.0107	324.464	73.3812
RCR_S_78	63.0335	92.8905	4.94273	1.47367	2809.65	76.8713	2.08657		0.0153734	7.92772	0.405585	13.5793	0.0530014	4.39333	0.318034	18.8674	4.39333	0.0555	12.849	308.365	24.2608	27.8644	432.432	286.267	286.835	345.691	39.7861	40.0533	332.922	14.2551	14.9153	3.69355	11.8263	203.258	15.6641	440.588	1.21517	0.0393341	31.8464	0.19857	3.59795	5.3043	1.71856	15.5847	4.77499	46.2391	14.9465	59.2833	12.4998
DH1_S_42	803.084	239.075	50.6911	0.297696	37864.8	3875.4	81.0867		0.0163278	5.44775	0.409576	3.65717	0.0546605	3.25836	0.863463	18.2947	3.25836	0.0543449	1.66072	327.355	17.6898	22.9852	385.341	37.3066	41.5014	348.569	10.79	11.7628	343.071	10.8863	11.8039	1.5773	4.36305	204.286	5.81136	894.422	3.33575		8.46538	0.0356672	1.16601	2.9679	0.153903	18.4725	6.86857	79.2521	30.2003	137.795	29.102
DH1_S_11	1110.44	25.2356	67.9865	0.0227258	51169.3	1026.38	66.221		0.0353946	29.6504	0.446368	2.99258	0.0562081	1.82233	0.548954	17.791	1.82233	0.057596	2.37374	703.031	204.868	207.27	514.398	52.1444	55.089	374.733	9.37756	10.6185	352.524	6.25164	7.81809	5.92663	2.88535	448.32	4.40458	753.37	1.56304	0.166937	22.6494	0.334923	2.02878	1.97075	0.651727	6.63769	3.36638	51.7113	24.9475	147.081	42.1257
RCR_S_126	170.223	120.657	12.29	0.708814	7727.21	163.634	4.89583		0.017852	6.28765	0.425835	6.83938	0.056536	4.55975	0.656155	17.6878	4.55975	0.0546279	5.09762	357.644	22.2896	27.267	397.029	114.277	115.713	360.215	20.7405	21.2902	354.525	15.729	16.4158	1.57964	7.15402	276.131	6.87343	1451.88	0.639387		11.8006	0.156281	2.90314	3.94423	1.6227	25.2925	8.88516	111.069	44.612	223.659	50.1869
RCR_S_112	214.91	27.0264	13.6771	0.125757	9764.52	1062.99	22.1691		0.0322366	25.2438	0.406177	5.77801	0.0566714	2.87266	0.477384	17.6456	2.87266	0.0519816	5.01331	641.288	159.344	161.796	284.576	114.653	116.142	346.119	16.9467	17.572	355.351	9.93176	10.9902	-2.66742	5.78814	158.931	4.64353	532.238	2.32965		3.07169	0.0582234	0.674996	1.31285	0.30976	8.85801	2.86402	40.5599	17.3234	90.5527	22.4694
RCR_S_92	666.286	174.287	44.087	0.26158	31504.7	1399.29	46.5162		0.0208216	8.08487	0.471558	5.22711	0.0568017	3.54443	0.660372	17.6051	3.54443	0.0602106	3.84184	416.529	33.3312	38.0763	611.126	83.0252	84.8511	392.265	17.0078	17.779	356.145	12.2809	13.1666	9.2079	5.02975	384.103	10.3287	1426.84	3.30738	0.960389	82.2101	1.65807	13.4234	11.9153	3.45887	35.0465	11.3216	133.624	47.9535	206.834	43.4519
DH1_S_18	335.203	88.5185	22.3987	0.264075	15503.1	1233.02	20.0374		0.0220386	9.50257	0.45842	4.70219	0.0575668	3.14336	0.646345	17.3711	3.14336	0.057755	3.49712	440.61	41.4162	45.9067	520.485	76.7408	78.7677	383.158	15.0076	15.8261	360.811	11.03	12.0045	5.83237	4.67878	122.226	3.40195	219.448	0.765677		13.9233	0.0619998	0.50251	0.997911	0.331313	5.52461	1.30372	18.5337	6.7954	36.1401	9.01138
DH1_S_63	492.053	87.8416	32.3908	0.17852	23668.3	23668.3	542.566		0.0207131	5.88823	0.453747	4.78181	0.0585233	4.28475	0.880051	17.0872	4.28475	0.056232	2.12288	414.379	24.1512	30.383	461.535	47.0589	50.366	379.9	15.1547	15.9647	366.639	15.2712	16.0236	3.49075	5.56599	519.475	5.98731	1560.63	1.78282		2.65173	0.097578	1.89181	4.67351	0.357615	30.0337	11.8368	136.777	54.202	246.335	54.3803
RCR_S_109	445.196	168.814	32.8625	0.379189	23479.9	5735.73	83.7068		0.0216271	8.25888	0.504853	8.75496	0.0616247	4.33666	0.486688	16.2273	4.33666	0.0594168	7.60545	432.47	35.3378	40.1361	582.413	165.151	166.085	414.982	29.8233	30.3113	385.498	16.2277	17.0163	7.10487	7.73699	345.755	6.80866	1291.17	14.7356	0.852196	21.5862	0.36786	3.65267	3.56727	0.727783	13.9797	6.4342	92.4412	39.2307	211.131	49.1747
DH1_S_6	677.526	196.331	48.783	0.289777	32671.7	1201.46	19.8293		0.0202259	8.89607	0.482693	3.89766	0.0620641	3.36003	0.837084	16.1124	3.36003	0.0564065	1.97534	404.73	35.647	40.0525	468.404	43.7362	47.2609	399.918	12.8841	13.9028	388.166	12.6576	13.6518	2.93869	4.44923	375.689	2.21969	1367.44	3.06645		12.495	0.143432	3.00483	5.7396	0.532132	28.997	10.0513	128.368	49.1104	226.902	50.2426
DH1_S_3	352.117	405.247	31.7203	1.15089	15678.8	525.696	18.3838		0.019226	4.57318	0.521077	5.96635	0.0640511	3.11896	0.50518	15.6125	3.11896	0.059003	5.0862	384.91	17.4361	24.6225	567.191	110.731	112.122	425.871	20.7534	21.4617	400.215	12.103	13.185	6.02421	5.38975	147.581	11.4604	1174.2	0.914113	0.0807861	18.3942	0.388716	5.906	8.21933	3.24957	33.8736	9.90008	110.321	39.3728	172.759	37.9994
DH1_S_58	837.165	5.25958	58.899	0.00628261	45384.9	2586.91	95.9587		0.0436982	32.0719	0.490369	3.11813	0.0655561	2.55614	0.77864	15.2541	2.55614	0.0542511	1.78575	864.482	271.41	274.067	381.5	40.1415	44.075	405.162	10.4172	11.6994	409.327	10.1377	11.5076	-1.02798	3.60666	408.909	1.78138	897.514	1.50822		1.29028		0.130906	0.57769	0.292593	4.28117	3.18402	64.1936	30.634	156.738	43.0111
DH1_S_67	455.969	289.776	37.7615	0.635518	26344.1	1147.72	9.26941		0.0202513	4.26094	0.509248	5.01438	0.0658216	3.76234	0.73293	15.1926	3.76234	0.0561125	3.31494	405.233	17.0948	24.8379	456.792	73.5448	75.7074	417.943	17.1797	18.0184	410.933	14.9782	15.9315	1.6774	5.40167	264.16	4.67733	1159.45	4.40838		32.1107	0.0526532	1.33378	3.90912	0.65062	22.3005	7.29798	96.1199	39.5753	178.332	40.8819
DH1_S_13	198.969	110.358	16.2904	0.554647	10400.7	320.449	13.0878		0.0207347	10.7779	0.549862	8.6785	0.0664032	4.38691	0.496897	15.0595	4.38691	0.060057	7.48809	414.807	44.2519	48.0362	605.652	161.968	162.91	444.906	31.2633	31.7712	414.45	17.6094	18.4199	6.84562	7.64949	261.831	14.0276	976.852	1.49267	0.00888246	12.0318	0.136625	1.56608	4.27807	0.83382	22.6641	7.68106	86.9475	34.7781	150.239	32.037
RCR_S_81	250.928	256.974	23.2057	1.0241	15091	15091	433.658		0.0210522	4.94245	0.508637	5.55027	0.067115	3.90092	0.687683	14.8998	3.90092	0.0549651	3.9482	421.093	20.597	27.7884	410.816	88.2958	90.1348	417.532	19.0006	19.7578	418.751	15.8159	16.7489	-0.291924	5.93114	336.328	10.8075	1589.66	4.87287		48.5084	0.12331	3.49909	6.0029	1.25708	33.6238	11.4867	138.443	53.1081	248.954	51.5876
RCR_S_88	201.424	150.596	17.8328	0.747656	11357.4	11372.9	466.778		0.0227191	5.17983	0.569806	7.61125	0.0674052	4.81654	0.623868	14.8356	4.81654	0.0613101	5.89339	454.063	23.2575	30.7148	650.105	126.537	127.727	457.889	28.0522	28.6516	420.504	19.6073	20.3724	8.16459	7.07042	310.682	6.36559	1399.57	1.22954	0.0144271	12.6233	0.14793	2.59227	5.9337	0.499241	31.1643	11.2435	130.211	47.1926	205.77	41.8683
RCR_S_87	111.368	90.6346	9.96912	0.813829	6569.72	436.996	5.40818		0.0221404	7.49939	0.525385	7.71574	0.067814	4.85834	0.620913	14.7462	4.85834	0.0561898	5.99409	442.623	32.8332	38.2208	459.891	132.91	134.118	428.743	26.984	27.5435	422.972	19.8898	20.6498	1.34592	7.7507	197.988	10.3162	565.429	0.669849		10.2667	0.0773148	1.67152	1.8464	0.782376	11.6378	4.13956	49.6254	18.4169	84.7174	19.6243
RCR_S_131	247.52	185.346	23.9627	0.748811	15571.9	4289.55	82.1671		0.022584	3.61171	0.643073	4.57888	0.0750896	4.23606	0.908187	13.3174	4.23606	0.0621125	1.73836	451.392	16.1223	25.4938	677.955	37.153	40.9951	504.207	18.1967	19.2622	466.746	19.0729	20.042	7.42962	5.04682	290.139	4.35817	1746.79	3.14487	0.113017	34.1808	0.363722	3.97809	6.5416	1.45913	26.9936	10.3443	127.795	53.737	261.94	58.1554
DH1_S_32	189.053	110.435	19.0768	0.58415	11430.9	247.423	3.02745		0.0348901	29.8304	0.729874	17.9448	0.075219	5.52642	0.304665	13.2945	5.52642	0.0703751	17.0727	693.18	203.273	205.601	939.33	349.961	350.354	556.479	76.8781	77.1733	467.522	24.9226	25.6555	15.9857	12.4408	246.825	5.81798	967.545	6.08104		27.0801	0.0467493	0.881014	2.05831	0.23586	15.957	6.03167	79.1326	32.0687	156.366	35.2909
RCR_S_96	191.078	1.88972	17.0418	0.0098898	13206.4	483.053	22.3673		0.0755407	34.8675	0.663078	5.0035	0.0835539	3.11932	0.602399	11.9683	3.11932	0.0575568	3.91214	1471.92	494.98	499.017	512.939	85.9584	87.7824	516.495	20.2561	21.2463	517.301	15.5058	16.9165	-0.15602	4.94384	127.767	1.75221	276.55	1.50054	0.0564896	0.710177	0.0196191	0.925421	0.17296	0.227118	3.35457	1.02634	17.0016	7.73152	46.6216	14.6217
RCR_S_137	1010.03	235.35	99.4179	0.233012	73944.2	18732.6	279.807		0.0278173	4.55867	0.695857	4.29	0.0845756	3.83706	0.874451	11.8237	3.83706	0.0596725	1.9186	554.57	24.9374	34.7322	591.714	41.5973	45.1593	536.313	17.8738	19.104	523.376	19.2887	20.5343	2.41226	4.84899	123.159	3.70993	1240.91	0.531454		4.69365	0.0955705	1.8654	3.95825	0.870926	21.5917	7.10647	90.6367	38.3875	188.262	44.1717
RCR_S_114	71.7382	36.1002	7.58269	0.503222	4635.9	10571.3	299.464		0.0281367	10.7375	0.704238	9.77009	0.0866676	3.75447	0.375327	11.5383	3.75447	0.0589334	9.0199	560.848	59.3934	64.2702	564.6	196.459	197.25	541.319	40.9938	41.528	535.799	19.3031	20.5289	1.01977	8.3007	791.546	15.3128	2006.48	1.06564	0.295503	10.1443	0.16217	2.13826	4.68658	1.02463	29.8604	12.1602	160.694	69.3769	319.899	69.2943
DH1_S_5	426.112	291.387	46.9912	0.683826	28241.1	28241.1	1314.12		0.0264091	4.88682	0.67063	4.10248	0.0867174	3.24441	0.766265	11.5317	3.24441	0.0560887	2.5108	526.857	25.4139	34.7533	455.912	55.7111	58.5307	521.095	16.7216	17.9162	536.094	16.6895	18.0867	-2.87833	4.59961	508.167	4.27296	2187.5	4.55165		24.4197	0.172387	3.67181	7.75446	0.922609	41.7993	15.4423	187.087	75.4081	371.276	78.4343
RCR_S_119	505.689	20.9599	48.4093	0.0414482	37703.5	37703.5	1778.49		0.0251688	16.9642	0.703169	4.2187	0.0885705	3.65435	0.844918	11.2904	3.65435	0.0575797	2.10787	502.42	84.181	87.0112	513.788	46.3085	49.6145	540.682	17.6852	18.9125	547.077	19.1673	20.4847	-1.18278	4.8498	299.931	2.72258	619.38	0.673026	0.0157373	1.82187	0.0200476	0.389128	2.06529	0.380691	14.2051	5.51557	61.778	19.9327	79.6089	15.9178
DH1_S_14	451.029	440.77	55.3613	0.977254	34258.6	7810.7	579.322		0.027656	4.5218	0.738214	5.58942	0.0894691	4.85402	0.85637	11.177	4.85402	0.0598422	2.7713	551.397	24.5961	34.8957	597.857	60.023	62.528	561.363	24.1032	25.05	552.397	25.6967	26.6855	1.59717	6.22943	894.056	8.71841	3671.34	8.1187	0.381272	34.4893	0.430277	5.66105	9.99492	1.30618	69.9831	26.4073	325.761	131.679	583.35	120.357
DH1_S_56	569.569	331.53	63.8709	0.58207	42633	3478.53	202.574		0.027683	5.46712	0.732842	5.35939	0.08949	4.90151	0.90209	11.1744	4.90151	0.0593929	2.16754	551.928	29.7663	38.5675	581.558	47.0741	50.2506	558.22	23.0142	24.008	552.52	25.9537	26.9494	1.02109	6.18617	527.092	2.3541	1237.89	3.67448	2.85354	23.3617	0.846325	5.82223	4.45723	0.48328	25.8225	7.80145	100.781	39.4175	183.231	40.2163
RCR_S_74	824.448	1008.87	109.717	1.22369	67285.5	2585.56	93.1067		0.0284468	2.95325	0.753136	4.13186	0.0905848	3.461	0.814701	11.0394	3.461	0.0602999	2.25694	566.945	16.5107	30.0067	614.353	48.7474	51.7912	570.043	18.0233	19.3383	558.995	18.5317	19.9661	1.93802	4.49238	427.452	6.21665	2190.62	4.05983		40.8875	0.168173	2.70839	7.52422	1.17971	43.015	15.2443	187.526	73.8079	340.109	76.3639
DH1_S_60	58.9064	33.97	6.61854	0.576677	4479.63	365.502	7.27558		0.0266748	12.1606	0.81264	9.34615	0.0913352	5.45417	0.577143	10.9487	5.45417	0.0645296	7.58964	532.089	63.8611	68.0877	759.007	160.079	160.987	603.934	42.5451	43.1448	563.429	29.4257	30.3146	6.70687	8.18128	157.354	16.0006	411.084	0.662781		8.58434		0.514859	0.849075	0.378042	7.66126	2.60197	34.6805	13.7237	63.3386	14.055
DH1_S_64	242.651	248.821	30.8434	1.02543	19208.5	1207.23	28.9388		0.0280204	5.17899	0.78389	5.99058	0.092368	4.90251	0.807208	10.8263	4.90251	0.0615506	3.44273	558.564	28.5319	37.7753	658.5	73.8164	75.8307	587.7	26.7292	27.6457	569.527	26.7233	27.7313	3.09233	6.33259	202.869	7.46707	724.015	1.18254		21.9565	0.0276073	0.640756	1.87537	0.602253	11.9449	4.34672	53.2742	22.4079	106.122	24.5819
RCR_S_122	110.216	131.915	14.7476	1.19688	8164.98	8164.98	142.188		0.0297117	4.53052	0.743232	6.73243	0.0929671	3.49751	0.505549	10.7565	3.49751	0.0579821	5.75266	591.789	26.4224	36.9688	529.068	126.053	127.298	564.29	29.1455	29.9422	573.061	19.1778	20.5806	-1.55439	6.25005	238.874	10.1983	1226.89	1.8719		21.9452	0.0792075	3.21903	6.50542	1.07344	31.1032	9.87041	120.121	42.2938	178.021	36.6651
DH1_S_45	339.122	441.812	46.53	1.30281	26831.9	18351.3	1385.31		0.0284028	3.83879	0.786878	4.93315	0.0938596	3.7597	0.744466	10.6542	3.7597	0.0608034	3.19383	566.08	21.4291	33.0745	632.288	68.7771	70.9517	589.4	22.058	23.1661	578.323	20.7964	22.1164	1.87928	5.09256	274.623	5.81116	2920.01	9.68975	0.0934968	31.1538	0.767021	14.9491	29.1809	0.90962	122.91	35.9729	348.632	116.015	432.385	73.9634
RCR_S_102	348.508	445.011	48.7804	1.2769	27094.5	2732.2	75.4146		0.030123	3.69329	0.828611	4.66141	0.0948393	4.0975	0.861836	10.5442	4.0975	0.0633667	2.22244	599.86	21.829	34.1942	720.559	47.1681	50.2055	612.841	21.4475	22.6627	584.094	22.881	24.1251	4.69082	5.00654	501.827	8.34025	3165.8	4.18665	1.28282	25.3874	1.63105	23.3898	34.1601	4.93455	138.72	36.1449	333.909	114.402	425.5	81.0344
RCR_S_129	70.3187	44.0467	8.50545	0.626386	5561.42	409.031	11.9639		0.0315012	6.71455	0.807279	7.43303	0.095591	3.64545	0.478311	10.4612	3.64545	0.0612499	6.4777	626.883	41.4463	49.6393	648.022	139.129	140.215	600.926	33.7128	34.4705	588.519	20.5039	21.8877	2.06479	6.46756	163.967	9.45783	1062.28	1.32006		4.08592	0.0857142	3.43057	7.43736	0.289458	36.2608	10.9074	113.327	39.3704	155.73	27.7284
DH1_S_19	45.4593	139.819	8.60923	3.0757	3476.2	1199.04	19.6286		0.0296277	6.57957	0.402238	19.0749	0.095638	5.10054	0.264031	10.4561	5.10054	0.0305036	18.3803	590.14	38.2673	46.5015	-1108.06	558.25	558.79	343.27	55.5589	55.7464	588.795	28.701	29.6804	-71.5254	28.9935	285.658	20.4365	1466.02	1.26154	0.0826962	31.0743	0.871505	10.0212	11.7801	2.69327	48.1701	13.5227	142.017	50.6848	200.866	37.7294
DH1_S_40	151.354	71.3345	18.5713	0.47131	11850.7	11850.7	145.955		0.0427876	4.95917	0.846056	5.0952	0.0963643	3.75467	0.719783	10.3773	3.75467	0.0636769	3.44434	846.839	41.1286	55.6559	730.9	72.9786	74.9663	622.482	23.7107	24.8179	593.067	21.2741	22.6099	4.7255	4.985	173.378	3.97035	440.543	1.62039	0.021838	26.9871	0.0656598	1.033	1.28368	0.546318	9.00481	2.90058	38.1364	14.2883	68.9521	15.8832
RCR_S_71	41.9576	28.6451	5.13751	0.682715	3429.04	4855.59	86.8809		0.0306372	9.81244	0.738077	13.4177	0.0964852	4.93539	0.362875	10.3643	4.93539	0.0554804	12.477	609.947	58.9566	64.8211	431.636	278.021	278.606	561.282	57.8549	58.2526	593.778	27.9961	29.0276	-5.78953	11.991	252.38	12.733	781.129	1.07792		14.8914	0.0995096	1.4713	4.29528	1.72834	21.4575	6.22102	73.1203	26.1634	115.014	25.853
DH1_S_50	248.117	96.3665	28.5152	0.388392	20824.9	1187.01	25.5876		0.0298114	6.53511	0.832098	4.03083	0.0969057	2.04967	0.468837	10.3193	2.04967	0.0622765	3.4708	593.746	38.2376	46.4563	683.597	74.1104	76.0995	614.776	18.5887	19.9673	596.249	11.673	14.0022	3.01353	3.49357	144.342	6.01306	646.72	2.05234		7.75495	0.0411566	1.64819	2.64915	0.311198	15.5175	5.14056	56.6987	20.5864	93.5192	18.7282
RCR_S_94	329.293	174.523	39.6097	0.529993	27711	894.062	20.2341		0.0308946	3.72226	0.813614	3.66663	0.0973147	2.74638	0.716429	10.2759	2.74638	0.0606371	2.42931	614.994	22.5469	35.204	626.402	52.3646	55.2	604.479	16.7021	18.2051	598.653	15.7009	17.5417	0.963858	3.77288	153.61	2.32124	464.596	1.18992		11.855	0.049119	0.172649	0.956828	0.343638	6.29434	2.66785	32.2104	13.8228	72.1739	17.7693
RCR_S_80	1303.95	53.241	142.391	0.0408304	113427	25165	517.933		0.0307187	6.06609	0.818871	3.56554	0.097562	3.07403	0.832223	10.2499	3.07403	0.0608742	1.80648	611.546	36.5413	45.4155	634.81	38.8847	42.6146	607.418	16.2993	17.9232	600.105	17.6148	19.3924	1.20392	3.9291	195.878	11.5621	268.138	0.691539		1.3033	0.113389	1.42288	5.4298	0.0732903	25.4071	6.16857	43.7149	9.41887	26.3543	3.70504
RCR_S_104	676.488	465.024	86.5619	0.687409	56759.4	8116.9	112.347		0.0309293	3.77022	0.834577	3.93718	0.0986818	3.51508	0.869067	10.1336	3.51508	0.0613378	1.77359	615.674	22.8623	35.3743	651.086	38.0744	41.8603	616.149	18.1864	19.6408	606.679	20.3526	21.8783	1.53687	4.3997	195.343	3.4994	504.19	2.63212		22.1272	0.0167209	0.525315	1.33147	0.640422	7.8617	2.62302	34.1905	15.5748	73.9376	19.2291
RCR_S_139	199.072	253.807	28.5375	1.27495	16999.7	1821.64	22.4026		0.0299959	5.15277	0.797692	4.91491	0.0990715	4.38382	0.876688	10.0937	4.38382	0.0583963	2.22225	597.367	30.3305	39.9522	544.662	48.5647	51.6965	595.526	22.1445	23.2761	608.965	25.4738	26.6873	-2.25675	5.72324	318.554	10.3081	2088.99	3.82486		49.7439	0.154464	3.36589	6.51797	2.9274	41.7028	14.0978	179.916	70.4531	318.594	69.1099
DH1_S_57	374.504	239.891	46.7026	0.640557	31954.5	31954.5	467.637		0.0293154	3.66847	0.817712	5.11478	0.0991049	4.06112	0.778217	10.0903	4.06112	0.0598417	3.10939	584.008	21.1176	33.4187	597.859	67.3449	69.5906	606.771	23.3632	24.4625	609.161	23.6058	24.9043	-0.393846	5.48433	213.526	2.96114	1605.57	10.898		14.9177	0.0190306	1.55242	3.96004	0.596813	33.5988	11.3744	143.016	57.7666	245.463	49.0916
RCR_S_132	319.086	368.42	45.2173	1.15461	26601.3	6537.72	111.277		0.0305261	3.05627	0.820056	3.2376	0.0998481	2.37132	0.689622	10.0152	2.37132	0.0595665	2.20429	607.769	18.2986	32.1901	587.894	47.8212	50.9533	608.079	14.812	16.512	613.519	13.8777	16.0379	-0.894518	3.35388	201.545	3.77443	1202.13	1.83288	0.022778	41.7819	0.264717	4.02975	6.88227	2.79675	27.8582	9.02786	96.8597	37.9396	171.394	39.0731
RCR_S_79	253.568	196.109	33.4467	0.773401	21228.4	9171.99	1113.91		0.0313766	4.40489	0.870948	5.20955	0.100879	3.57072	0.667784	9.91285	3.57072	0.0626166	3.79333	624.442	27.0854	38.6226	695.21	80.8431	82.6656	636.082	24.6241	25.7388	619.559	21.0929	22.5765	2.59761	5.02137	238.768	14.5091	602.661	1.77855	0.260586	20.2515	0.234461	4.92391	7.49733	1.50515	27.8649	7.91967	65.9592	20.1597	75.4875	14.2804
RCR_S_101	84.2713	66.9609	11.3945	0.794587	7307.72	9996.3	161.421		0.0335152	7.41775	0.877346	6.10648	0.10238	4.15542	0.667555	9.76756	4.15542	0.0621521	4.47455	666.309	48.6193	56.7104	679.357	95.6084	97.1635	639.548	28.9766	29.933	628.34	24.878	26.1737	1.75252	5.91156	237.302	14.8088	901.41	1.09015		10.0347	0.109091	2.28284	3.901	0.991191	19.4684	6.14935	74.9825	29.4015	141.813	31.577
RCR_S_133	179.747	184.668	25.894	1.02738	15083.3	2292.61	60.6219		0.0336632	4.29465	0.934738	5.17677	0.102515	1.75602	0.303056	9.7547	1.75602	0.0661306	4.86984	669.204	28.2694	40.5785	810.544	101.864	103.266	670.124	25.3955	26.5659	629.129	10.5257	13.3405	6.11759	3.88913	165.221	6.22804	843.758	1.18493	0.873551	25.6935	0.396694	3.35274	5.79799	2.1382	22.4816	6.83755	73.3998	26.9851	122.572	27.1173
RCR_S_107	272.694	162.856	35.5854	0.597211	10959.4	2584.9	175.29		0.0329951	7.97889	0.994793	6.68269	0.103578	4.34017	0.638143	9.65454	4.34017	0.0696567	5.08146	656.136	51.5118	58.979	918.246	104.504	105.824	701.163	33.8389	34.7766	635.345	26.2597	27.5209	9.38696	5.75761	2193.82	30.5671	1718.56	1.21353	31.2041	81.3967	9.86797	42.3962	16.5547	0.997241	41.6956	13.1733	143.799	54.6049	240.083	47.4054
RCR_S_125	98.1007	75.7286	13.0937	0.771948	8682.15	8682.15	371.542		0.0302068	4.93336	0.887015	7.91497	0.103824	3.44421	0.423099	9.6317	3.44421	0.061963	7.1263	601.504	29.2372	39.2992	672.833	152.433	153.416	644.764	37.7776	38.5281	636.779	20.8836	22.4585	1.23843	6.63138	537.082	2.47425	3286.37	3.10376		20.7105	0.062616	2.23893	7.81961	2.03431	62.3138	23.0758	304.026	118.429	539.8	113.235
RCR_S_83	140.448	105.012	19.0579	0.747694	13219.4	470.936	10.3921		0.0322331	5.0577	0.88089	6.40015	0.105105	4.27328	0.655689	9.51426	4.27328	0.0607849	4.76456	641.22	31.922	42.6214	631.624	102.613	104.086	641.463	30.4353	31.3512	644.259	26.2	27.4924	-0.435845	6.27622	271.028	3.97182	1150.84	1.36357	0.026436	14.1009	0.0375344	0.959188	2.03041	0.5627	16.2567	6.21243	81.8119	35.5505	186.256	44.0082
RCR_S_84	328.456	194.834	43.8912	0.59318	32365.4	4442.62	47.1747		0.0328733	4.74561	0.911356	4.72982	0.10654	3.36177	0.690127	9.38617	3.36177	0.0620404	3.32712	653.752	30.5281	41.9549	675.482	71.1375	73.2155	657.778	22.8992	24.1601	652.621	20.8656	22.5302	0.784026	4.68963	484.251	3.34208	2000.75	3.68149	0.019645	14.4112	0.118133	2.15423	5.82254	0.409835	37.7694	14.5461	178.452	69.1407	303.394	62.7038
DH1_S_61	175.714	131.843	24.3514	0.750328	16209.6	1368.79	21.1486		0.0325713	6.09498	0.926424	5.31581	0.107189	3.85564	0.709321	9.32934	3.85564	0.0626844	3.65949	647.842	38.8598	48.2891	697.527	77.9607	79.8463	665.752	25.9571	27.08	656.4	24.0626	25.5098	1.4046	5.27646	190.746	10.9705	300.264	1.18832		12.2891	0.0931162	2.60176	3.07586	1.78075	11.3332	2.61469	29.1148	10.3312	40.5974	8.81921
RCR_S_90	203.312	11.574	24.1268	0.0569274	18738.6	1582.34	35.0082		0.0353901	23.1433	0.968837	6.32907	0.109265	4.82585	0.751745	9.15203	4.82585	0.0643083	4.09491	702.943	159.888	162.838	751.781	86.469	88.1449	687.864	31.6236	32.6007	668.48	30.6435	31.8421	2.81808	6.30929	239.384	3.00886	449.427	0.827924		0.409385	0.0400704	0.257002	1.1696	0.147508	10.3922	4.28102	50.4502	15.7811	52.8206	8.68772
RCR_S_115	62.6311	8.68114	7.84144	0.138607	5653.27	257.787	3.23894		0.0496558	13.1868	0.990794	6.02787	0.111387	3.02585	0.483966	8.97772	3.02585	0.0645132	5.2134	979.527	126.088	133.04	758.519	109.966	111.287	699.125	30.4615	31.4944	680.797	19.5494	21.4327	2.62164	5.08143	200.251	14.7556	559.78	1.39837		2.62284	0.038767	0.872224	2.44274	0.454214	13.193	4.33264	50.8065	19.5018	78.1213	15.0759
RCR_S_111	204.579	22.8586	26.6681	0.111735	20236.5	659.126	29.9023		0.0377084	10.8379	1.1525	9.98739	0.117316	4.15755	0.408371	8.52396	4.15755	0.0712493	9.0809	748.149	79.6013	86.0389	964.551	185.424	186.161	778.422	54.2975	54.9804	715.098	28.1409	29.6224	8.13491	7.35731	161.878	2.43347	71.3903	0.244797		0.496446			0.317932	0.29703	1.81217	0.578134	6.99919	2.067	8.44344	2.03382
DH1_S_69	175.156	368.446	35.6401	2.10353	17304.5	2415.56	44.7863		0.0365059	3.89226	1.10028	4.94546	0.118385	4.11353	0.815661	8.44703	4.11353	0.0674073	2.74526	724.714	27.7081	42.2997	850.38	57.062	59.4929	753.487	26.3065	27.6193	721.26	28.0697	29.5613	4.277	5.00466	321.378	5.07461	2308.97	4.32284	0.107108	31.5837	0.439479	6.2134	12.261	5.55414	54.818	16.9831	194.216	72.413	330.556	76.0632
DH1_S_31	284.199	54.7936	39.3724	0.1928	28521.9	1744.51	41.3503		0.0458067	6.7078	1.13764	4.78816	0.120543	3.51846	0.715387	8.29581	3.51846	0.0684483	3.24761	905.273	59.3841	71.6507	882.172	67.166	69.2199	771.39	25.8743	27.25	733.687	24.3996	26.1573	4.88763	4.49256	422.87	7.0149	1253.84	3.86553	0.083543	3.75996	0.101842	1.37171	2.55827	0.248733	19.1205	7.5153	99.6119	40.3978	189.735	41.3181
DH1_S_34	262.112	79.4572	39.9232	0.303142	28968.1	28968.1	1028.34		0.0452977	5.19824	1.25518	3.37486	0.128479	2.13532	0.587271	7.7834	2.13532	0.0708555	2.61344	895.432	45.5307	60.3714	953.233	53.4569	55.9613	825.739	19.0726	21.0654	779.181	15.6718	18.5803	5.63841	2.89005	515.714	5.5861	1823.84	3.93015	0.0212747	6.89095	0.0566366	1.18933	3.96054	0.209086	28.131	11.1652	151.668	63.7776	297.257	65.1899
RCR_S_121	1241.2	554.046	221.909	0.446379	156512	156512	7930.22		0.0463665	2.43592	1.32261	4.53466	0.13925	3.67755	0.791286	7.18134	3.67755	0.0688867	2.65307	916.089	21.8171	45.3128	895.33	54.7578	57.2567	855.654	26.2198	27.9205	840.419	28.9769	31.1425	1.78054	4.53068	980.942	6.14032	3620.74	5.32925	0.0416344	9.41633	0.467276	7.34098	15.8617	0.920677	94.4202	34.1596	356.506	124.983	530.887	100.653
RCR_S_113	1527.82	200.328	257.406	0.13112	185071	12171.8	687.77		0.0518894	6.35472	1.43687	4.31182	0.139942	4.23402	0.963964	7.1458	4.23402	0.0744675	0.815405	1022.49	63.3603	77.2966	1054.18	16.4241	23.1576	904.416	25.8152	27.693	844.336	33.5071	35.4562	6.64287	4.56363	175.377	14.0391	785.591	12.7509	0.25566	14.7826	0.417294	3.51816	3.09601	1.05837	12.8438	5.19276	63.2905	25.6237	125.716	29.9717
RCR_S_72	786.487	48.651	125.053	0.0618586	98743.7	15008.9	166.643		0.0411196	6.18822	1.36822	6.409	0.141017	6.12459	0.947267	7.09133	6.12459	0.070369	1.88805	814.482	49.3999	61.0023	939.138	38.7033	42.1138	875.4	37.5971	38.783	850.413	48.795	50.0639	2.85437	6.96258	171.914	6.2047	209.793	0.224328		0.998556		0.560301	2.8875		14.2538	3.8204	31.3093	6.4322	17.0537	2.471
DH1_S_47	756.472	1372.66	182.525	1.81455	95552.3	4084.83	32.5271		0.0445996	2.05586	1.44607	3.37639	0.144418	3.08383	0.881885	6.92433	3.08383	0.0726215	1.37477	881.93	17.7413	42.7847	1003.43	27.9044	32.3826	908.242	20.2676	22.472	869.599	25.0869	27.5502	4.25475	3.49204	490.649	12.1647	2910.84	5.91314	0.355438	51.9314	1.43582	20.5095	33.4296	1.73187	119.288	32.1779	313.888	105.856	405.599	74.4517
DH1_S_28	655.325	56.779	112.19	0.0866425	83013.3	6615.4	49.815		0.0426714	10.4495	1.59259	5.9927	0.151102	5.64194	0.931786	6.61803	5.64194	0.0764417	2.02013	844.586	86.4368	94.2265	1106.66	40.3727	43.4911	967.311	37.3785	38.7001	907.14	47.7424	49.1681	6.2204	6.12306	478.482	6.66636	1246.89	1.12408	0.085093	5.05485	0.082375	0.678617	2.16919	0.440611	13.856	6.63221	96.7602	43.355	217.992	49.3847
RCR_S_73	273.669	348.308	63.1245	1.27273	40176.7	3351.35	76.8797		0.0462481	3.18165	1.56457	4.73396	0.158437	4.32054	0.896634	6.31166	4.32054	0.0716204	1.93476	913.802	28.4266	49.1123	975.184	39.4409	42.7572	956.278	29.3248	30.9417	948.085	38.0926	39.9682	0.856723	5.01108	305.422	4.65607	1323.43	2.7103	0.0350163	34.0533	0.160379	3.98358	4.57608	1.52845	29.3145	9.25389	107.757	43.7652	210.237	49.1656
RCR_S_136	541.436	86.8883	101.263	0.160477	79085.9	79085.9	1247.03		0.0510304	4.47298	1.64342	4.18691	0.162025	3.97329	0.929221	6.1719	3.97329	0.0735643	1.32029	1005.98	43.8958	61.7127	1029.54	26.6929	31.3245	987.028	26.4305	28.3428	968.018	35.7136	37.8775	1.92594	4.47092	83.5972	5.55553	337.174	2.24428		4.35468	0.0241112	0.340216	0.859878	0.250614	6.88915	2.5216	28.516	10.0669	46.7899	9.88427
DH1_S_37	335.476	390.456	79.8986	1.16389	48852.7	1452.83	35.0973		0.050624	2.81432	1.70396	2.85341	0.16416	2.08082	0.674081	6.09162	2.08082	0.0752819	1.95246	998.163	27.4091	51.8875	1076.03	39.1989	42.4331	1010.02	18.258	20.9086	979.853	18.915	22.6533	2.98664	2.56566	208.419	13.4321	1028.85	0.688372	0.0911402	47.2531	0.436252	8.10342	11.018	4.32122	42.7169	12.1956	114.159	37.3713	143.065	27.5777
DH1_S_68	1323.62	109.496	259.329	0.0827245	198128	198128	6491.2		0.0602676	7.39203	1.70333	4.15928	0.164223	3.99455	0.940659	6.08929	3.99455	0.0752255	1.15897	1182.84	84.9268	99.3694	1074.51	23.2737	28.392	1009.78	26.6102	28.6852	980.201	36.3231	38.6902	2.92958	4.41393	366.292	6.86656	1218.81	4.7369	0.327615	39.477	0.431495	2.467	2.33142	0.612856	12.4186	5.56861	85.6025	36.3036	212.024	56.8773
DH1_S_15	458.956	211.534	93.4079	0.460901	62819.6	3551.08	73.1809		0.0503504	3.60637	1.63335	4.22436	0.164715	3.82089	0.884215	6.0711	3.82089	0.0719192	1.80166	992.897	34.9423	56.222	983.646	36.6804	40.2088	983.15	26.6048	28.4409	982.925	34.8334	37.0235	0.0229317	4.45787	121.993	4.31093	375.271	2.48342		25.7539	0.0114199	0.131433	0.978779	0.112643	4.09871	1.62375	22.0567	10.0128	61.404	17.5278
RCR_S_91	418.589	4.02261	76.3579	0.00960992	61886.5	3067.39	83.857		0.0415733	36.2217	1.69325	3.03807	0.166015	2.60539	0.816119	6.02355	2.60539	0.0739728	1.56264	823.288	292.217	294.43	1040.73	31.5392	35.5259	1005.99	19.3942	21.9384	990.117	23.913	27.091	1.57772	3.04151	590.677	7.56887	1290.59	0.724842		0.218135		0.29562	0.776986	0.285604	13.7327	7.04501	111.872	44.5971	189.988	38.658
DH1_S_27	641.342	167.371	127.717	0.260969	94781.7	12043.1	224.966		0.0505864	2.66434	1.72015	2.37866	0.167202	2.22344	0.872846	5.9808	2.22344	0.0746147	0.845188	997.439	25.9301	51.1976	1058.16	17.0138	23.5539	1016.08	15.2734	18.4552	996.675	20.5323	24.2427	1.90988	2.50148	225.075	5.4825	773.058	18.6128		36.6462		0.268083	1.21786	0.111398	7.66063	3.38216	50.4623	23.9226	133.561	35.4838
RCR_S_85	722.799	111.328	144.6	0.154023	115082	115082	2769.83		0.0549916	4.00095	1.79966	4.25899	0.170518	3.78646	0.868704	5.86448	3.78646	0.0765454	1.94981	1082.01	42.1525	63.2079	1109.37	38.9516	42.1796	1045.34	27.7985	29.7708	1014.97	35.5585	37.9681	2.90528	4.2706	89.0885	11.3344	202.633	0.245114		1.39523			0.317683	0.064037	2.77901	1.05769	13.6226	6.38368	30.157	7.80318
RCR_S_108	87.3957	75.0353	20.0599	0.85857	12483.5	2862.36	100.761		0.0528226	5.19276	1.74969	4.93808	0.171379	4.23619	0.842164	5.83501	4.23619	0.0740461	2.53758	1040.41	52.6593	69.3394	1042.73	51.2012	53.7488	1027.05	31.9055	33.5087	1019.71	39.9535	41.9681	0.714934	4.96448	186.803	5.42838	906.381	1.87612		27.6923	0.312254	3.66095	5.3457	1.73045	22.3365	7.28522	82.0294	31.2521	139.678	30.747
RCR_S_134	145.512	191.478	37.5729	1.31589	22391.6	19557.5	419.929		0.0522972	4.16932	1.81319	4.18489	0.175378	2.91763	0.670263	5.70198	2.91763	0.0749836	3.00013	1030.33	41.881	61.048	1068.05	60.3046	62.4679	1050.23	27.3879	29.3056	1041.67	28.0638	31.0099	0.814565	3.71897	184.397	7.33085	933.156	4.18463	0.137445	84.1664	1.45237	19.1586	21.2814	9.03776	60.9305	12.7832	107.814	31.0345	114.08	21.9421
RCR_S_103	355.763	36.1876	69.8049	0.101718	53825.1	1136.29	52.2785		0.0473563	5.75344	1.75128	3.79382	0.1754	2.85821	0.723106	5.70127	2.85821	0.0724146	2.49474	935.2	52.5803	66.4855	997.6	50.6831	53.2898	1027.64	24.5204	26.6226	1041.79	27.4951	30.5512	-1.37769	3.60695	176.503	8.98313	241.552	0.688361		0.685231	0.0198628	0.636979	3.09953	0.0567389	21.6412	5.16918	37.5271	7.48337	19.0451	2.7882
DH1_S_41	27.4443	24.4133	6.46761	0.889559	4082.52	183.712	3.53855		0.0511391	6.4749	1.72897	10.4467	0.178163	4.57115	0.43071	5.61285	4.57115	0.0703832	9.3935	1008.07	63.6705	77.6523	939.575	192.543	193.256	1019.37	67.2043	67.9606	1056.93	44.561	46.456	-3.68488	8.11394	166.434	26.2399	767.826	1.22068		39.0623	0.134596	3.16537	4.37411	1.25167	22.6654	6.67158	75.924	26.7886	114.763	23.651
RCR_S_99	560.317	42.9811	114.476	0.0767084	85135.5	12706	123.097		0.0631596	5.8598	1.86674	2.01289	0.179979	1.61949	0.703851	5.55621	1.61949	0.0752248	1.19541	1237.9	70.3617	88.3909	1074.52	24.0051	29.0002	1069.38	13.309	17.0813	1066.86	15.9237	21.062	0.235438	1.9388	127.136	3.29721	634.565	7.13387	0.0719396	7.58735	0.163964	1.53952	2.13403	0.530835	12.628	4.32612	57.1234	20.5203	87.8963	18.0358
RCR_S_98	48.8825	23.7969	10.7667	0.486818	7409.47	461.444	5.82207		0.0540579	3.35118	1.90494	6.20366	0.180406	4.3006	0.680934	5.54305	4.3006	0.0765826	4.47104	1064.12	34.738	57.8303	1110.37	89.3043	90.7588	1082.82	41.3069	42.6272	1069.19	42.3708	44.4319	1.25845	5.43139	220.143	17.0056	527.218	1.57314		19.8048	0.0483684	0.836629	1.70403	0.632845	11.1694	3.94772	49.2884	17.5008	76.7695	16.5159
RCR_S_128	117.606	37.7735	25.1394	0.321188	17971.6	1982.66	40.6078		0.0551958	8.80871	1.95447	4.53337	0.181309	3.08968	0.658078	5.51545	3.08968	0.0781825	3.31744	1085.93	93.1317	104.229	1151.51	65.8624	67.8006	1099.98	30.451	32.2708	1074.12	30.5694	33.4334	2.35134	3.87693	179.99	1.77365	539.163	2.11497		6.48393	0.020177	0.206248	1.17976	0.0321387	8.48373	3.04079	43.6703	16.9877	82.6715	18.9293
RCR_S_100	226.656	177.272	53.9037	0.782116	34343.3	5220.15	177.974		0.0518135	4.16944	1.85736	4.50067	0.181976	3.59978	0.779569	5.49522	3.59978	0.0740254	2.70141	1021.03	41.514	60.7512	1042.15	54.512	56.9115	1066.05	29.7056	31.5148	1077.76	35.7273	38.2388	-1.09863	4.37811	268.653	3.72751	737.497	6.23794	0.0728375	17.6256	0.0282313	0.51683	0.724478		7.18012	3.2247	49.3182	21.9983	121.796	31.4309
DH1_S_44	92.5859	55.6721	23.7474	0.601302	14790.7	300.199	16.8161		0.0938703	38.2561	2.43234	20.6249	0.182102	5.87663	0.282227	5.49142	5.87663	0.0968742	19.7699	1813.48	663.553	668.156	1564.79	370.593	370.903	1252.21	148.407	148.841	1078.45	58.3589	59.8877	13.8767	11.2206	249.79	25.955	971.652	2.86324	0.0277644	27.2016	0.266577	5.91958	6.86564	1.2385	29.3185	9.03394	97.1901	34.8781	134.531	28.6826
RCR_S_76	276.742	72.8192	60.7753	0.26313	45801.2	2900.68	63.3665		0.0653116	4.58156	2.02715	4.03512	0.184892	3.40124	0.819009	5.40858	3.40124	0.0795186	2.17113	1278.77	56.7726	79.4049	1185.1	42.8928	45.7802	1124.66	27.4371	29.5069	1093.64	34.2132	36.9067	2.75813	3.85774	350.88	16.7391	1261.96	2.69784		5.27527	0.0757071	1.03948	3.92859	0.285841	22.1739	8.44874	108.466	43.849	209.008	44.5578
DH1_S_46	254.836	105.715	58.8273	0.414834	41346.9	41346.9	798.366		0.056805	4.93657	2.04962	4.51278	0.189887	3.82331	0.828228	5.2663	3.82331	0.0782848	2.3974	1116.73	53.6327	72.6622	1154.1	47.5787	50.2178	1132.17	30.7965	32.6526	1120.76	39.332	41.7767	1.00758	4.39542	369.206	14.1063	1487.41	1.43505	0.0236086	4.24335	0.0993186	2.03844	5.93867	0.0914249	33.2682	11.2356	136.388	50.9482	227.333	45.4151
RCR_S_97	750.026	129.856	175.269	0.173135	134171	2789.43	124.501		0.0785628	3.54584	2.57309	11.7989	0.190524	10.0356	0.847784	5.24867	10.0356	0.0979499	6.20486	1528.63	52.2039	83.8976	1585.47	115.997	116.982	1293.02	86.2746	87.1079	1124.22	103.532	104.578	13.0552	9.88769	354.791	9.53603	665.039	0.664602	0.224115	54.6015	0.94764	9.02593	13.0016	1.78008	50.3293	11.1735	84.1009	21.6045	82.8235	16.5905
DH1_S_48	85.5882	34.6834	19.6411	0.405236	13968.9	1647.3	45.6452		0.0569939	5.33852	2.03546	5.1797	0.191381	3.42246	0.642263	5.22519	3.42246	0.0771372	3.88793	1120.34	58.182	76.17	1124.75	77.4929	79.1549	1127.44	35.2673	36.8666	1128.85	35.4409	38.1133	-0.124608	4.43741	255.361	12.375	833.017	2.91679		6.28912	0.0176765	0.913287	2.67534	0.117776	15.6814	5.82112	73.1977	27.3615	131.253	26.3828
DH1_S_39	280.624	98.3003	64.5084	0.350292	45371.6	4939.29	62.6811		0.0578663	3.29789	2.08455	3.76708	0.191591	3.26482	0.840041	5.21944	3.26482	0.0789105	1.87932	1137.01	36.4622	61.8808	1169.9	37.2103	40.5143	1143.73	25.8496	28.0602	1129.99	33.8396	36.6967	1.20155	3.70675	138.826	3.50705	2520.72	3.35258		13.0684	0.411124	7.92292	14.2021	0.608128	67.9191	22.6453	249.765	91.1966	389.337	72.6314
DH1_S_70	125.451	46.9625	29.3586	0.37435	19965.7	22762.6	683.459		0.0577444	6.13734	2.10519	5.30403	0.196375	4.99439	0.929242	5.09229	4.99439	0.0777506	1.78574	1134.68	67.7208	83.9018	1140.51	35.5102	38.991	1150.51	36.5123	38.104	1155.82	52.847	54.7721	-0.461813	5.59141	179.576	4.60342	998.047	13.6239		14.2753	0.118306	1.4186	3.6997	0.175297	19.6876	7.58631	95.7118	35.4649	156.158	32.2573
RCR_S_110	191.489	87.9583	46.9287	0.459339	32367.2	2355.22	34.5323		0.0596878	4.96052	2.21324	4.39996	0.199736	3.75723	0.834059	5.00661	3.75723	0.0803659	2.28974	1171.79	56.4738	75.8434	1205.96	45.1005	47.8421	1185.24	30.7726	32.7312	1173.9	40.3233	42.9326	0.956405	4.26463	230.517	4.21111	1018.69	2.52958		7.71318	0.0302402	1.58756	4.13703	0.0823262	20.5576	6.87277	81.8431	32.4178	149.117	31.4522
DH1_S_16	226.954	29.6871	51.2716	0.130807	34554.5	34554.5	2016.39		0.0603773	11.1376	2.17882	6.69163	0.200149	6.2695	0.929116	4.99628	6.2695	0.0789527	2.33907	1184.93	128.179	138.441	1170.95	46.3066	48.9982	1174.3	46.5712	47.8562	1176.12	67.4015	68.9699	-0.154933	6.98005	141.102	3.02622	497.485	4.44984	0.063486	5.00971	0.0378402	0.55251	0.759307	0.0607727	6.73188	2.67511	39.1543	17.2874	95.07	25.4725
DH1_S_55	224.998	169.249	61.1803	0.752224	39862.5	2291.24	38.4799		0.062192	5.04753	2.41211	4.21284	0.205028	2.66096	0.602398	4.87739	2.66096	0.0853263	3.26608	1219.49	59.7342	80.0662	1322.95	63.2678	65.1826	1246.21	30.2398	32.323	1202.27	29.1858	32.8218	3.52569	3.31135	277.55	32.995	1342.44	6.40691	0.210841	21.8342	0.236529	4.08944	5.53111	0.595364	31.7122	10.8249	123.263	47.009	201.622	41.816
DH1_S_7	243.901	90.2698	61.1604	0.370109	41706.3	7961.6	63.087		0.0571095	4.2201	2.40542	4.52687	0.209344	4.47119	0.971537	4.77683	4.47119	0.0833354	0.707821	1122.55	46.0812	67.8163	1277.06	13.8005	20.9564	1244.22	32.4675	34.3994	1225.32	49.8944	52.1604	1.51876	4.76287	533.716	9.99778	1798.93	0.979905		2.45906	0.119961	2.26958	6.13105	0.187228	39.9905	13.1905	161.976	61.6423	273.707	54.8428
RCR_S_117	208.383	78.8202	55.5906	0.378247	38346.4	3451.16	113.013		0.0677589	4.03861	2.53515	4.29573	0.220106	3.9926	0.91028	4.54326	3.9926	0.0835354	1.58508	1325.15	51.8009	76.9592	1281.75	30.8837	34.6874	1282.18	31.2797	33.3759	1282.44	46.431	49.119	-0.0198604	4.36662	233.993	10.7578	1781.74	3.0076	1.42285	9.31533	0.628123	5.50179	7.43661	0.102521	43.3382	14.2274	175.114	63.6511	275.921	51.7333
RCR_S_124	77.3269	30.1085	21.4442	0.389367	11675.1	424.772	20.6478		0.0800465	7.5764	2.81633	6.51311	0.22566	4.8873	0.740058	4.43144	4.8873	0.0905163	4.30521	1556.42	113.495	131.486	1436.45	82.0988	83.5415	1359.89	48.804	50.2316	1311.72	58.006	60.2231	3.54265	5.49341	241.847	21.3262	751.021	1.31148	0.17976	9.65278	0.19569	2.13772	2.94545	0.40309	13.0298	4.5101	61.4946	24.51	112.84	24.1584
DH1_S_62	410.65	544.41	141.997	1.32573	81171	81171	2860.35		0.0666339	2.88897	2.78765	4.06153	0.22997	3.35819	0.802795	4.3484	3.35819	0.0879156	2.28441	1303.84	36.4783	67.4729	1380.64	43.8977	46.5738	1352.23	30.352	32.6551	1334.34	40.4762	43.8241	1.32304	3.72365	409.569	5.19576	3426.15	2.60101	0.374134	27.389	0.360811	6.23557	13.2983	2.3368	74.0817	24.5074	298.426	118.232	535.4	114.863
RCR_S_140	175.446	146.802	55.5248	0.836735	35842.7	1145.61	13.0817		0.0696875	4.17857	2.88606	3.77607	0.23466	3.32928	0.855529	4.26149	3.32928	0.0892003	1.78174	1361.62	55.0222	80.0646	1408.48	34.1071	37.4729	1378.28	28.4751	30.927	1358.87	40.7905	44.1547	1.40782	3.59274	373.334	2.93794	1793.1	2.76301		48.8781	0.157522	2.43441	7.14084	1.48739	34.003	11.5898	145.43	60.9651	282.627	60.9918
RCR_S_105	312.421	96.4787	89.7577	0.30881	62872.9	6434.92	284.962		0.0716366	4.05505	3.03153	3.05646	0.237661	2.52658	0.784118	4.20767	2.52658	0.092513	1.71998	1398.42	54.7893	81.3521	1477.93	32.6161	36.0548	1415.59	23.3368	26.3726	1374.53	31.2757	35.696	2.90103	2.72831	119.014	4.30937	567.985	6.27213	0.175035	6.49456	0.0457124	0.307667	0.608866	0.20305	4.13241	1.77843	29.6648	15.3694	89.3247	22.1683
DH1_S_22	254.055	165.923	79.5407	0.6531	39953.7	2653.22	276.442		0.0668425	8.7824	3.0665	8.24234	0.244056	7.22444	0.871006	4.09743	7.22444	0.0911283	3.96783	1307.79	111.219	125.201	1449.28	75.5338	77.0882	1424.36	63.1107	64.2684	1407.75	91.3633	92.9776	1.1665	7.76661	153.793	6.11035	1971.31	0.345815	0.101118	10.3306	0.131741	3.7335	8.37386	2.49006	47.9663	16.229	185.454	72.1866	288.42	58.8645
DH1_S_2	206.628	23.785	58.6424	0.11511	40541.8	18486.4	197.972		0.104089	6.99417	3.23157	4.15039	0.245161	2.89302	0.669806	4.07895	2.89302	0.0956007	2.97593	2001.42	133.275	159.106	1539.92	55.9685	57.9988	1464.76	32.1833	34.4466	1413.47	36.7194	40.5826	3.50175	3.28324	248.231	3.08164	974.061	1.51857		2.85801	0.0392232	1.4746	3.40965	0.624109	18.7313	6.62189	87.6322	33.9853	155.442	34.0724
RCR_S_106	365.338	284.204	125.675	0.77792	78700.1	5184.49	112.766		0.0818985	2.71569	3.44772	3.79743	0.247654	3.56102	0.913461	4.03789	3.56102	0.100968	1.31896	1591.05	41.551	79.7633	1641.99	24.4776	28.7285	1515.35	29.8892	32.4858	1426.37	45.5663	48.9573	5.8721	3.53397	431.097	20.7056	1778.29	5.18969	0.855917	76.8558	0.758539	6.17508	7.49763	1.97849	39.4695	12.3669	157.064	60.0754	267.678	58.8077
DH1_S_21	1100.24	325.415	367.188	0.295768	261266	202374	3351.52		0.0810143	3.48354	3.58334	3.41157	0.252621	3.29443	0.936541	3.95849	3.29443	0.102876	0.886307	1574.52	52.7671	86.6923	1676.66	16.3755	22.1726	1545.85	27.0826	30.2704	1451.98	42.8301	47.0546	6.07214	3.22249	102.307	3.64503	439.446	5.73142		35.7325	0.0198204	0.450229	0.806431	0.137064	4.26667	1.5108	23.9485	12.0697	72.5174	20.633
RCR_S_116	81.5127	53.0054	29.0807	0.650272	18943.5	1363.92	21.0386		0.0825013	8.09554	3.66238	5.42374	0.275587	3.90226	0.703958	3.62861	3.90226	0.0963836	3.76686	1602.3	124.707	142.218	1555.25	70.7003	72.3185	1563.21	43.2598	45.079	1555.25	70.7003	72.3185	-0.376883	4.45012	318.347	17.8973	831.284	1.50585		15.8242	0.022625	0.592441	1.81442	0.42712	13.7046	4.9553	66.5569	27.5706	124.907	27.9218
RCR_S_120	477.92	91.9378	165.573	0.192371	122999	7190.65	198.267		0.0844137	5.52231	4.27943	4.26023	0.284304	4.0615	0.934363	3.51736	4.0615	0.10917	1.28602	1637.98	86.8862	111.438	1785.6	23.4385	27.7059	1689.41	35.0641	37.5773	1785.6	23.4385	27.7059	4.5229	3.9619	304.968	6.79454	978.021	6.62677		8.94962	0.0487165	0.597574	1.09198	0.0740576	12.8164	5.59284	76.7113	34.0518	157.582	35.5298
DH1_S_33	95.2616	75.5815	36.5289	0.79341	23006.1	23006.1	797.583		0.0805661	6.13672	4.15447	4.95895	0.287865	4.03754	0.797835	3.47385	4.03754	0.104671	2.87915	1566.14	92.4805	114.921	1708.52	52.9816	55.0348	1665.09	40.5837	42.5929	1708.52	52.9816	55.0348	2.0562	4.2316	266.833	5.00886	622.367	2.25431		16.7192	0.0748136	1.05195	2.23425	0.297219	11.1327	4.18484	52.0111	21.7771	104.92	22.944
DH1_S_66	46.7834	43.1075	18.1061	0.921428	11460	11460	258.934		0.077144	7.13578	3.85808	5.86042	0.287901	4.32396	0.724885	3.47342	4.32396	0.0971913	3.95575	1502.03	103.296	122.06	1570.9	74.0924	75.6289	1604.96	47.2569	48.9415	1570.9	74.0924	75.6289	-1.6244	4.90167	229.161	24.548	526.384	0.944783		24.4127	0.0689359	1.70015	2.96163	0.334642	13.292	4.11363	48.8184	18.3024	80.9336	17.2523
DH1_S_36	74.7567	71.0211	31.8828	0.95003	18329.3	296.385	6.23099		0.10245	4.27133	4.93158	5.32599	0.292422	4.42169	0.816304	3.41972	4.42169	0.122314	2.96897	1971.39	80.2286	116.872	1990.26	52.7996	54.7261	1807.68	44.962	46.8933	1990.26	52.7996	54.7261	8.52232	4.23151	322.33	19.4187	1659.59	1.1634		14.0454	0.316559	4.105	9.41449	2.27651	46.5705	14.1587	164.117	60.5532	254.446	51.2805
DH1_S_17	253.531	163.099	97.3836	0.643311	55220.2	4391.9	240.427		0.0867745	5.13497	4.12097	5.59997	0.292564	5.28034	0.931855	3.41805	5.28034	0.102159	1.86486	1681.94	82.871	110.661	1663.7	34.5125	37.6205	1658.47	45.7575	47.5724	1663.7	34.5125	37.6205	0.249558	5.39961	228.964	9.2413	825.716	3.82721	0.125671	52.8779	0.18064	2.01757	3.06687	0.715795	15.4683	5.18181	66.7708	28.129	137.294	32.475
RCR_S_75	686.184	209.855	261.563	0.305829	201269	9560.19	333.631		0.0904039	4.61232	4.50689	4.8724	0.293811	4.76415	0.963653	3.40355	4.76415	0.111252	1.02136	1749.32	77.2914	107.761	1819.97	18.5364	23.6572	1732.24	40.4896	42.8218	1819.97	18.5364	23.6572	4.1391	4.60766	229.491	5.59875	1143.04	3.20207	1.44777	61.3111	2.27005	16.6311	11.9089	3.38166	34.3529	10.2477	106.506	37.9067	167.337	39.1254
DH1_S_59	128.777	45.4263	48.9547	0.352751	35298.6	34492.6	499.09		0.0869483	6.57733	4.64682	4.8479	0.312366	4.52924	0.91934	3.20137	4.52924	0.107892	1.72862	1685.17	106.344	128.831	1764.14	31.5884	34.882	1757.72	40.5075	42.6285	1764.14	31.5884	34.882	0.306211	4.57276	184.669	12.2128	889.71	2.62056		11.2145	0.101418	2.42934	5.831	0.231101	25.8724	7.94376	86.6263	31.1075	129.86	25.81
RCR_S_77	152.336	99.6898	66.8574	0.654405	44749.8	3566.14	64.5726		0.100677	3.82741	5.41349	7.94059	0.328675	7.80746	0.977944	3.04251	7.80746	0.119456	1.44791	1938.86	70.7601	108.926	1948.1	25.877	29.6505	1886.99	68.0558	69.4172	1948.1	25.877	29.6505	2.91642	7.46942	136.266	4.96546	510.497	1.10506	0.0297631	26.4854	0.109375	1.44553	2.84951	0.708019	15.3966	3.96062	42.5821	16.5974	72.5698	17.34
RCR_S_93	195.767	58.1364	78.647	0.296968	57270	6421.64	119.874		0.0969965	3.54918	5.13541	3.95863	0.328754	3.54385	0.871828	3.04179	3.54385	0.113293	1.76405	1871.16	63.4294	101.924	1852.9	31.8871	35.0892	1841.98	33.6439	36.3019	1852.9	31.8871	35.0892	0.523567	3.56613	265.173	5.78725	826.324	3.25125		10.3868	0.0415092	0.53431	1.54589	0.194758	11.7505	5.15795	63.784	28.006	128.696	28.5173
RCR_S_82	99.9322	85.891	44.3947	0.859493	28225.8	28225.8	417.456		0.0818746	11.2562	5.45005	5.15792	0.331764	4.10516	0.7804	3.01419	4.10516	0.119143	3.1228	1590.6	172.178	185.287	1943.42	55.8413	57.6892	1892.76	44.253	46.3049	1943.42	55.8413	57.6892	2.42171	4.16366	381.848	4.04943	1026.54	0.870623	0.202334	13.2755	0.251369	6.37538	6.56835	0.999041	19.9743	6.76833	88.6349	36.0058	155.817	35.1768
DH1_S_10	166.458	79.1815	72.5395	0.475686	45998.4	6050.58	174.968		0.103229	3.29486	5.99334	4.29459	0.337774	3.89984	0.888549	2.96056	3.89984	0.128689	1.79852	1985.66	62.3138	106.307	2080.15	31.6564	34.7109	1974.88	37.3711	39.8413	2080.15	31.6564	34.7109	5.00926	3.68266	204.182	17.4771	419.048	2.22059		13.2504	0.0158434	0.532607	1.3221	0.323331	7.5637	2.95516	35.4149	13.9562	62.2438	12.9383
DH1_S_24	34.478	28.9609	15.9887	0.839982	9503.09	520.003	16.8376		0.0957593	6.08307	5.54	6.26273	0.343353	4.8751	0.767708	2.91245	4.8751	0.117022	3.93132	1848.35	107.449	134.058	1911.23	70.5673	72.0464	1906.83	53.8674	55.5381	1911.23	70.5673	72.0464	0.212146	5.06872	124.541	10.403	233.858	0.560785		15.1906	0.018247	0.435571	1.23546	0.272514	5.82581	2.11052	21.1615	7.83964	33.4755	7.46914
DH1_S_4	261.506	213.654	126.01	0.817014	67611.9	5793.15	105.046		0.0995744	2.75032	6.37987	3.32596	0.345124	2.99764	0.868478	2.89751	2.99764	0.134071	1.44088	1918.6	50.3406	97.4554	2151.97	25.1582	28.8511	2029.5	29.1951	32.3859	2151.97	25.1582	28.8511	5.82553	2.79347	209.118	6.47369	1186.15	1.98383		30.7419	0.102737	2.59914	4.92228	1.29301	27.0963	8.6897	99.6857	40.2379	170.831	38.3139
DH1_S_49	252.794	151.137	116.75	0.597864	80616.5	8250.84	251.919		0.0988231	3.20271	6.19644	3.503	0.346546	3.37389	0.935418	2.88562	3.37389	0.129682	0.942283	1904.79	58.2185	100.549	2093.66	16.5603	21.8323	2003.95	30.6263	33.7051	2093.66	16.5603	21.8323	4.28462	3.15306	175.464	5.29718	699.06	3.20967		25.477	0.0285294	1.29613	2.45617	0.247115	13.6379	4.38632	55.8874	22.9916	113.319	24.398
RCR_S_130	288.482	245.177	139.54	0.849888	87127.3	24000.7	1290.78		0.0988532	4.59581	5.51981	4.9324	0.347427	4.82373	0.964155	2.8783	4.82373	0.115228	1.02967	1905.34	83.5653	116.002	1883.45	18.5442	23.6026	1903.69	42.4012	44.642	1883.45	18.5442	23.6026	-0.977726	4.77466	261.701	6.9904	923.697	5.9258		35.4017	0.174395	4.06864	6.1134	1.26799	25.3984	7.34914	84.0419	31.0616	136.477	27.8745
DH1_S_26	215.894	258.586	116.226	1.19774	66800.7	4237.31	77.8682		0.105471	3.04331	6.20472	3.28155	0.357779	2.94298	0.862929	2.79502	2.94298	0.125778	1.45171	2026.7	58.6871	105.348	2039.77	25.6701	29.3883	2005.11	28.6956	31.9223	2039.77	25.6701	29.3883	1.66959	2.8629	203.121	7.97622	564.35	3.19805		29.1483	0.0996872	1.89103	3.15572	0.515484	16.2285	5.04677	51.7124	19.2202	74.4786	14.6156
RCR_S_127	266.295	65.2577	120.401	0.245058	79646	21790.1	595.353		0.117268	5.42831	7.11719	6.56821	0.360098	3.90953	0.582423	2.77702	3.90953	0.143346	5.27796	2241.26	115.16	148.603	2268.03	90.9976	92.0648	2126.2	58.4763	60.2298	2268.03	90.9976	92.0648	6.75187	4.05288	291.371	14.6598	968.116	0.966299	0.382084	51.4178	0.6975	7.14258	8.47191	3.19799	27.5149	8.84332	92.7246	31.1965	131.503	28.2747
DH1_S_30	181.017	125.91	91.426	0.695574	58593.3	1473.43	41.1021		0.105035	3.69242	6.87277	1.63168	0.373902	1.21285	0.577858	2.6745	1.21285	0.133313	1.09149	2018.73	70.9385	112.27	2142.05	19.0789	23.7508	2095.15	14.4633	20.2339	2142.05	19.0789	23.7508	2.26319	1.21927	131.938	3.29151	638.841	0.684254		23.4477	0.13462	1.63091	3.63392	0.857096	18.4592	5.36584	56.411	20.4484	91.524	19.7862
DH1_S_20	64.5917	89.4849	52.9211	1.38539	26449.6	672.541	32.6992		0.144769	3.69537	13.4848	4.67403	0.517115	4.13472	0.867679	1.93381	4.13472	0.189129	2.1796	2732.75	94.4559	149.662	2734.6	35.8716	38.2633	2714.22	44.1828	46.637	2734.6	35.8716	38.2633	1.00553	3.71494	183.006	7.24108	507.336	1.31237		26.4584	0.0694204	0.982541	2.68285	0.29341	12.3105	3.53779	40.9438	16.2351	74.379	15.4656
DH1_S_8	44.6012	41.162	34.1646	0.922889	18714.8	711.154	18.4492		0.14128	4.38657	14.7862	5.35871	0.526409	4.62245	0.849398	1.89966	4.62245	0.20372	2.71085	2671.05	109.756	158.239	2856.23	44.1249	46.0473	2801.58	50.9647	53.1176	2856.23	44.1249	46.0473	2.68706	4.07292	204.05	10.605	272.422	0.661763		14.5531	0.0683513	0.946714	2.35531	0.761671	9.04681	2.81111	28.28	9.29814	42.3749	8.87112
DH1_S_52	93.363	54.5835	77.4897	0.584637	46597.5	1300.92	132.93		0.163661	5.53237	17.3038	5.26616	0.598298	5.07419	0.951284	1.67141	5.07419	0.20976	1.40891	3063.57	157.268	202.859	2903.7	22.8369	26.3384	2951.83	50.5503	52.8136	2903.7	22.8369	26.3384	-2.41025	4.50364	184.858	4.20448	514.266	0.614851		5.28763	0.0341385	0.638054	1.7761	0.995443	13.8672	4.20197	45.7518	16.8749	69.4002	14.7264
[truncated: 7 more columns]

## Sheet: Sheet2
DH1_S_10	2080.15	31.6564	34.7109
DH1_S_11	352.524	6.25164	7.81809
DH1_S_13	414.45	17.6094	18.4199
DH1_S_14	552.397	25.6967	26.6855
DH1_S_15	982.925	34.8334	37.0235
DH1_S_16	1176.12	67.4015	68.9699
DH1_S_17	1663.7	34.5125	37.6205
DH1_S_18	360.811	11.03	12.0045
DH1_S_19	588.795	28.701	29.6804
DH1_S_2	1413.47	36.7194	40.5826
DH1_S_20	2734.6	35.8716	38.2633
DH1_S_21	1451.98	42.8301	47.0546
DH1_S_22	1407.75	91.3633	92.9776
DH1_S_24	1911.23	70.5673	72.0464
DH1_S_26	2039.77	25.6701	29.3883
DH1_S_27	996.675	20.5323	24.2427
DH1_S_28	907.14	47.7424	49.1681
DH1_S_29	238.09	15.1266	15.4502
DH1_S_3	400.215	12.103	13.185
DH1_S_30	2142.05	19.0789	23.7508
DH1_S_31	733.687	24.3996	26.1573
DH1_S_32	467.522	24.9226	25.6555
DH1_S_33	1708.52	52.9816	55.0348
DH1_S_34	779.181	15.6718	18.5803
DH1_S_36	1990.26	52.7996	54.7261
DH1_S_37	979.853	18.915	22.6533
DH1_S_39	1129.99	33.8396	36.6967
DH1_S_4	2151.97	25.1582	28.8511
DH1_S_40	593.067	21.2741	22.6099
DH1_S_41	1056.93	44.561	46.456
DH1_S_42	343.071	10.8863	11.8039
DH1_S_43	239.949	11.2906	11.7284
DH1_S_44	1078.45	58.3589	59.8877
DH1_S_45	578.323	20.7964	22.1164
DH1_S_46	1120.76	39.332	41.7767
DH1_S_47	869.599	25.0869	27.5502
DH1_S_48	1128.85	35.4409	38.1133
DH1_S_49	2093.66	16.5603	21.8323
DH1_S_5	536.094	16.6895	18.0867
DH1_S_50	596.249	11.673	14.0022
DH1_S_51	226.857	7.12268	7.73335
DH1_S_52	2903.7	22.8369	26.3384
DH1_S_55	1202.27	29.1858	32.8218
DH1_S_56	552.52	25.9537	26.9494
DH1_S_57	609.161	23.6058	24.9043
DH1_S_58	409.327	10.1377	11.5076
DH1_S_59	1764.14	31.5884	34.882
DH1_S_6	388.166	12.6576	13.6518
DH1_S_60	563.429	29.4257	30.3146
DH1_S_61	656.4	24.0626	25.5098
DH1_S_62	1334.34	40.4762	43.8241
DH1_S_63	366.639	15.2712	16.0236
DH1_S_64	569.527	26.7233	27.7313
DH1_S_65	221.484	7.97088	8.49812
DH1_S_66	1570.9	74.0924	75.6289
DH1_S_67	410.933	14.9782	15.9315
DH1_S_68	980.201	36.3231	38.6902
DH1_S_69	721.26	28.0697	29.5613
DH1_S_7	1225.32	49.8944	52.1604
DH1_S_70	1155.82	52.847	54.7721
DH1_S_8	2856.23	44.1249	46.0473
RCR_S_100	1077.76	35.7273	38.2388
RCR_S_101	628.34	24.878	26.1737
RCR_S_102	584.094	22.881	24.1251
RCR_S_103	1041.79	27.4951	30.5512
RCR_S_104	606.679	20.3526	21.8783
RCR_S_105	1374.53	31.2757	35.696
RCR_S_106	1426.37	45.5663	48.9573
RCR_S_107	635.345	26.2597	27.5209
RCR_S_108	1019.71	39.9535	41.9681
RCR_S_109	385.498	16.2277	17.0163
RCR_S_110	1173.9	40.3233	42.9326
RCR_S_111	715.098	28.1409	29.6224
RCR_S_112	355.351	9.93176	10.9902
RCR_S_113	844.336	33.5071	35.4562
RCR_S_114	535.799	19.3031	20.5289
RCR_S_115	680.797	19.5494	21.4327
RCR_S_116	1555.25	70.7003	72.3185
RCR_S_117	1282.44	46.431	49.119
RCR_S_119	547.077	19.1673	20.4847
RCR_S_120	1785.6	23.4385	27.7059
RCR_S_121	840.419	28.9769	31.1425
RCR_S_122	573.061	19.1778	20.5806
RCR_S_124	1311.72	58.006	60.2231
RCR_S_125	636.779	20.8836	22.4585
RCR_S_126	354.525	15.729	16.4158
RCR_S_127	2268.03	90.9976	92.0648
RCR_S_128	1074.12	30.5694	33.4334
RCR_S_129	588.519	20.5039	21.8877
RCR_S_130	1883.45	18.5442	23.6026
RCR_S_131	466.746	19.0729	20.042
RCR_S_132	613.519	13.8777	16.0379
RCR_S_133	629.129	10.5257	13.3405
RCR_S_134	1041.67	28.0638	31.0099
RCR_S_136	968.018	35.7136	37.8775
RCR_S_137	523.376	19.2887	20.5343
RCR_S_139	608.965	25.4738	26.6873
RCR_S_140	1358.87	40.7905	44.1547
RCR_S_71	593.778	27.9961	29.0276
RCR_S_72	850.413	48.795	50.0639
RCR_S_73	948.085	38.0926	39.9682
RCR_S_74	558.995	18.5317	19.9661
RCR_S_75	1819.97	18.5364	23.6572
RCR_S_76	1093.64	34.2132	36.9067
RCR_S_77	1948.1	25.877	29.6505
RCR_S_78	332.922	14.2551	14.9153
RCR_S_79	619.559	21.0929	22.5765
RCR_S_80	600.105	17.6148	19.3924
RCR_S_81	418.751	15.8159	16.7489
RCR_S_82	1943.42	55.8413	57.6892
RCR_S_83	644.259	26.2	27.4924
RCR_S_84	652.621	20.8656	22.5302
RCR_S_85	1014.97	35.5585	37.9681
RCR_S_87	422.972	19.8898	20.6498
RCR_S_88	420.504	19.6073	20.3724
RCR_S_89	326.548	12.5401	13.2708
RCR_S_90	668.48	30.6435	31.8421
RCR_S_91	990.117	23.913	27.091
RCR_S_92	356.145	12.2809	13.1666
RCR_S_93	1852.9	31.8871	35.0892
RCR_S_94	598.653	15.7009	17.5417
RCR_S_96	517.301	15.5058	16.9165
RCR_S_97	1124.22	103.532	104.578
RCR_S_98	1069.19	42.3708	44.4319
RCR_S_99	1066.86	15.9237	21.062

## Sheet: Table S3 Standard data
Table S3. U-Pb isotope ratios and trace element concentrations by LA-ICPMS: standard data
				Composition									Corrected isotope ratios													Dates (Ma)																	Concentrations (ppm)
	U	Th	Pb		206Pb	206Pb			208Pb	±2s	207Pb	±2s	206Pb	±2s	error	238U	±2s	207Pb	±2s	208Pb	±2s	±2s-sys	207Pb	±2s	±2s-sys	207Pb	±2s	±2s-sys	206Pb	±2s	±2s-sys	disc.	±2s
Analysis	ppm	ppm	ppm	Th/U	cps	204Pb	±1s		232Th	(%)	235U	(%)	238U	(%)	corr.	206Pb	(%)	206Pb	(%)	232Th	(Ma)	(Ma)	206Pb	(Ma)	(Ma)	235U	(Ma)	(Ma)	238U	(Ma)	(Ma)	(%)	(%)	P	Ti	Y	Nb	La	Ce	Pr	Nd	Sm	Eu	Gd	Tb	Dy	Ho	Er	Tm
Primary standards
PL_141	476.857	42.8337	27.1478	0.089825	19672.1	19672.1	399.567		0.0173278	11.242	0.385735	5.07171	0.0523839	2.54891	0.477277	19.0898	2.54891	0.053406	4.38467	347.233	38.7027	41.7738	346.08	99.1813	100.854	331.249	14.3349	15.0086	329.141	8.17894	9.25416	0.63649	4.95846	201.759	26.2569	296.801	2.01353		1.48838	0.0349234	0.699282	1.44129	0.263715	6.41072	2.40165	29.6693	9.31607	35.9363	6.29832
PL_142	391.782	40.2581	22.8439	0.102756	16504.6	37621.8	560.669		0.0167786	16.3209	0.400209	5.51063	0.0535561	3.37536	0.594935	18.672	3.37536	0.0541972	4.35592	336.317	54.4359	56.5258	379.234	97.9563	99.6304	341.8	15.9928	16.6306	336.317	11.0609	11.9099	1.6041	5.62747	184.475	25.3666	255.512	1.6338		1.56447	0.0320884	0.445916	0.758849	0.34327	5.39108	2.12519	24.6538	7.88654	28.4542	5.40332
PL_143	427.454	41.6481	25.2087	0.097433	18591.9	1382.24	25.8417		0.0177029	13.0374	0.388653	5.69857	0.0542562	2.84687	0.479417	18.4311	2.84687	0.0519531	4.9365	354.683	45.8383	48.5668	283.335	112.921	114.426	333.385	16.1944	16.7998	340.599	9.44471	10.4513	-2.16401	5.71436	177.328	24.9131	255.443	1.52322		1.53424	0.0387127	0.533906	1.29746	0.266228	6.6744	2.30833	27.0958	8.1845	29.6167	5.27007
PL_151	621.482	58.4618	36.3606	0.0940684	28570.2	2326.41	41.6359		0.0160907	12.0902	0.402966	4.63754	0.0536679	3.71664	0.782439	18.6331	3.71664	0.0544569	2.77369	322.64	38.6979	41.3448	389.969	62.2575	64.8516	343.797	13.525	14.2881	337.001	12.2034	12.991	1.9767	5.24121	290.394	61.2144	327.246	4.05245		1.87987	0.0392512	0.944057	2.01364	0.491395	8.982	3.1212	37.1175	10.3998	36.806	6.06092
PL_152	616.447	57.7908	36.0112	0.0937482	29587.8	2857.26	46.3555		0.016977	12.3402	0.399586	5.76543	0.0535036	4.63178	0.791117	18.6903	4.63178	0.0541659	3.43318	340.261	41.6374	44.3736	377.935	77.2235	79.3386	341.348	16.7137	17.3301	335.996	15.164	15.8018	1.56796	6.55464	284.536	57.8585	328.082	3.68012	0.0200982	1.87088	0.0593867	0.899334	1.68673	0.51177	8.68329	3.34682	34.6676	9.66023	35.6126	5.74788
PL_144	404.242	41.1017	23.4827	0.101676	16484.7	16484.7	328.534		0.016045	12.152	0.389898	4.60031	0.0535074	3.22729	0.679484	18.689	3.22729	0.0528489	3.27833	321.729	38.7869	41.3964	322.327	74.469	76.7041	334.295	13.1034	13.851	336.019	10.5665	11.4567	-0.515826	5.05114	209.993	25.3117	264.594	1.66528		1.47664	0.055058	0.500267	1.16877	0.332606	5.09878	2.50009	26.6283	8.49064	29.8234	5.48864
PL_145	496.482	39.5149	28.9636	0.0795899	20995.2	664.839	10.0475		0.0181332	8.52639	0.392893	5.18703	0.0538167	3.80885	0.717729	18.5816	3.80885	0.0529488	3.52107	363.227	30.6935	34.7584	326.609	79.9222	82.0057	336.48	14.8561	15.5285	337.912	12.539	13.3087	-0.42531	5.79195	220.603	26.7536	325.145	1.68077		1.31582	0.0226096	0.420381	1.27989	0.213413	6.29792	2.26099	29.2094	9.37139	38.5339	7.04312
PL_161	846.752	95.4339	47.691	0.112706	30476.7	1248.26	25.6056		0.0152228	10.081	0.377425	4.48876	0.0514421	4.10417	0.89654	19.4393	4.10417	0.0532122	1.8179	305.367	30.5527	33.4788	337.837	41.1813	45.079	325.142	12.4887	13.244	323.369	12.9442	13.6386	0.545283	5.51743	461.224	94.4491	822.869	4.90648		2.55377	0.223518	2.92941	5.15325	1.37995	19.289	7.94997	86.4368	25.178	87.2305	15.244
PL_162	760.154	85.8315	43.7419	0.112913	30274	4073.75	93.9704		0.0163073	8.48096	0.392055	4.59004	0.0524275	3.62881	0.770915	19.074	3.62881	0.0542358	2.81073	326.946	27.5051	31.1609	380.847	63.1898	65.7579	335.869	13.1261	13.8862	329.408	11.6533	12.4473	1.92381	5.17005	501.783	87.8225	748.205	4.38733		2.52988	0.107073	1.9203	4.3776	1.14544	20.8817	7.43111	76.2969	22.3499	78.8779	13.1888
PL_146	475.458	41.1865	27.8199	0.086625	19259.2	4249.34	68.4981		0.0172024	9.9244	0.397918	5.06287	0.0539468	3.47102	0.666932	18.5368	3.47102	0.0534967	3.68574	344.741	33.9233	37.2491	349.901	83.3155	85.3021	340.137	14.6332	15.3302	338.707	11.4531	12.2987	0.420376	5.44895	264.31	28.4578	315.225	1.6432		1.57243	0.0178581	0.689615	0.537046	0.202979	6.4419	2.50166	31.7699	9.49225	38.0113	7.01406
PL_147	362.864	39.0861	21.9236	0.107716	15504.9	3314.19	41.3004		0.018015	9.69009	0.405994	5.60561	0.0554277	4.20325	0.735918	18.0415	4.20325	0.0531241	3.70884	360.881	34.6594	38.2147	334.089	84.0731	86.0531	345.986	16.4357	17.0758	347.759	14.2299	14.9523	-0.512276	6.30187	152.722	25.41	267.302	1.17777		1.42045	0.0236805	0.462002	1.27415	0.308537	6.68759	2.07088	25.2777	8.2795	30.817	5.94453
PL_153	604.661	55.5372	34.9747	0.0918484	28614.1	2724.71	46.7309		0.0172274	10.5412	0.37311	4.9082	0.0531555	4.24224	0.848567	18.8127	4.24224	0.0509081	2.46857	345.238	36.0832	39.2144	236.683	56.9446	59.9308	321.956	13.542	14.2328	333.866	13.8029	14.5003	-3.69921	6.11596	301.428	61.4394	342.854	4.29959		1.84105	0.0387153	0.806434	2.45714	0.627142	8.4	3.28782	34.838	10.0387	36.2001	6.19735
PL_154	561.821	53.5347	33.1984	0.0952879	26473.6	727.217	12.1945		0.0163655	10.6307	0.382749	4.51035	0.0543979	3.24865	0.697885	18.383	3.24865	0.0510306	3.12882	328.104	34.5981	37.5511	242.196	72.1039	74.4802	329.059	12.6768	13.4384	341.466	10.8044	11.7187	-3.77056	5.17325	316.651	59.5866	311.168	3.88711		1.74297	0.0641049	0.85928	1.98289	0.509043	8.11196	3.1062	31.2512	9.40218	32.0424	5.50797
PL_155	596.833	55.9152	34.4032	0.0936864	27684.9	976.092	14.3996		0.0164658	9.36164	0.378794	4.60083	0.0529771	4.42508	0.945685	18.8761	4.42508	0.0518578	1.25948	330.099	30.6517	33.9696	279.117	28.8322	34.2809	326.15	12.8342	13.5781	332.773	14.3519	15.0211	-2.03064	5.95679	278.348	61.3996	324.021	3.97505		1.56812	0.06761	1.17013	1.51966	0.445058	9.26826	3.32151	34.0634	10.3249	36.5205	5.85572
PL_156	575.142	54.2093	33.4209	0.0942537	27326.9	27326.9	545.466		0.0160006	9.89697	0.397908	4.69696	0.0533437	3.39896	0.703099	18.7463	3.39896	0.0541	3.24169	320.847	31.5034	34.5694	375.237	72.9494	75.1926	340.129	13.5753	14.3311	335.018	11.0963	11.96	1.50288	5.1086	291.201	58.7784	325.926	4.21386		1.67747	0.0458799	1.32604	1.58445	0.475621	7.84072	3.05381	35.3787	9.58085	33.5512	5.91076
PL_163	814.83	91.9625	47.1414	0.112861	32194.4	2100.59	57.866		0.0178559	8.71912	0.387266	4.72844	0.052555	3.79059	0.783344	19.0277	3.79059	0.0534434	2.82658	357.722	30.9159	34.721	347.693	63.9181	66.4925	332.37	13.4028	14.1432	330.189	12.201	12.9753	0.6563	5.43359	475.642	96.6155	772.744	4.46388	0.00954073	2.4293	0.220127	3.26195	4.4732	1.14013	22.736	8.07057	82.7554	24.4705	83.5672	14.3309
PL_164	752.559	87.0723	43.6188	0.115702	31026.5	31026.5	569.205		0.016709	10.7019	0.392126	5.41475	0.0527327	4.62877	0.841746	18.9635	4.62877	0.0539316	2.80964	334.934	35.5488	38.5076	368.213	63.3052	65.8852	335.921	15.4866	16.1426	331.277	14.9467	15.5887	1.38239	6.36145	510.121	85.3584	739.307	4.24141	0.0407423	2.42121	0.121478	3.01158	5.29633	1.30987	19.5598	7.332	79.1993	22.6796	77.0235	14.2656
PL_165	731.098	81.2707	43.2206	0.111162	32158.7	846.016	15.0417		0.0149355	5.23915	0.398093	4.56414	0.0540815	2.93044	0.617501	18.4906	2.93044	0.0533869	3.49912	299.647	15.5831	20.4304	345.28	79.1611	81.2569	340.264	13.1958	13.9786	339.531	9.69228	10.7047	0.215401	4.80508	472.107	84.3871	699.314	4.16505		2.19882	0.159006	2.19741	4.39906	1.23229	18.7751	7.05599	74.2308	22.2386	75.6982	12.9716
PL_166	771.029	86.8288	44.1741	0.112614	33257	2849.49	65.2974		0.0162574	8.36242	0.382077	4.21209	0.0521946	3.4429	0.794736	19.1591	3.4429	0.0530915	2.42655	325.955	27.0391	30.616	332.717	55.0186	58.0065	328.566	11.8235	12.6436	327.981	11.0096	11.8547	0.177901	4.91236	489.103	88.3969	753.731	4.53564		2.42248	0.164745	2.66108	5.37796	1.30278	19.5549	7.32899	79.2345	22.129	78.2812	14.0028
PL_157	554.942	53.161	32.8916	0.0957956	26356.7	1767.44	31.9996		0.0179582	11.5962	0.401324	4.6065	0.0542845	2.91953	0.609352	18.4215	2.91953	0.0536188	3.56316	359.752	41.3486	44.2615	355.055	80.4714	82.5279	342.608	13.3954	14.1749	340.773	9.69058	10.7083	0.535607	4.80873	286.417	58.7846	328.05	3.66829		1.76514	0.0173437	1.0646	1.78768	0.539149	7.51379	2.96735	32.723	9.31692	32.9642	5.78683
PL_158	566.086	53.9543	32.7755	0.0953112	26555.3	1297.41	21.6407		0.0188061	6.86964	0.395948	4.53137	0.052884	3.41397	0.732166	18.9093	3.41397	0.0543016	2.97962	376.581	25.6302	30.4932	383.576	66.9542	69.3882	338.705	13.0505	13.8348	332.203	11.0541	11.9144	1.91958	4.99328	289.986	59.8914	328.7	3.89178		1.70471	0.0648185	0.800668	1.65855	0.599191	8.75066	2.8941	33.7688	9.13177	32.1238	5.88454
PL_167	763.064	84.263	44.4434	0.110427	30285.8	30285.8	665.111		0.016563	7.44393	0.391786	4.47666	0.0531358	3.62166	0.788732	18.8197	3.62166	0.0534761	2.63136	332.031	24.5142	28.5012	349.093	59.4884	62.2489	335.673	12.7956	13.5864	333.745	11.7796	12.6023	0.574372	5.16517	458.19	86.4314	739.192	4.65441	0.0402885	2.10401	0.268854	2.77205	4.41201	1.70492	20.1306	7.05901	76.3701	22.838	76.4287	13.7463
Secondary standards
91500_201	52.4922	16.2123	11.0484	0.308851	6694.85	665.296	12.1384		0.0526999	15.2399	1.92102	7.10804	0.180605	4.32047	0.597178	5.53693	4.32047	0.0771437	5.64428	1038.06	154.205	160.972	1124.9	112.498	113.647	1088.42	47.4654	48.6057	1070.28	42.6064	44.6161	1.66685	5.80624	107.214	4.43825	63.8718	0.724729		1.80171				0.0352484	0.916615	0.308389	5.27221	2.14833	12.0287	3.14996
91500_202	50.5321	15.7015	10.381	0.310723	6802.39	6802.39	171.173		0.0453748	14.666	1.83508	5.0913	0.178349	3.51978	0.673081	5.60699	3.51978	0.0746247	3.67865	896.924	128.667	134.751	1058.4	74.0503	75.8189	1058.1	33.4617	35.0117	1057.95	34.3424	36.7565	0.0142376	4.53128	109.809	3.45439	64.1493	0.616062		1.61195			0.124946		1.05529	0.281063	4.81112	1.81869	10.723	2.78653
91500_203	50.8881	15.3577	10.3776	0.301793	6567.47	6567.47	101.205		0.0553641	13.8872	1.78966	4.90537	0.174577	3.38199	0.669713	5.72814	3.38199	0.0743503	3.55313	1089.15	147.249	154.894	1050.99	71.603	73.4365	1041.7	31.9536	33.5528	1037.28	32.4038	34.8787	0.42457	4.35956	69.3304	3.27018	64.5201	0.620047		1.73041				0.0691475	0.97931	0.326494	4.30171	2.24575	11.3977	2.92224
91500_204	52.3665	15.7267	10.6536	0.30032	6525.86	526.187	12.2765		0.0600604	8.20216	1.79265	8.37087	0.17274	5.69325	0.673245	5.78905	5.69325	0.0752666	6.13664	1178.89	93.9286	107.062	1075.63	123.21	124.278	1042.79	54.5607	55.5206	1027.19	54.0592	55.5655	1.49604	7.3101	47.925	4.24046	64.1627	0.499822		1.55485					0.799748	0.35405	4.50038	2.02528	11.4504	3.17662
91500_206	52.0533	16.4417	10.2848	0.315863	6478.63	583.073	14.7882		0.048021	13.6497	1.73334	5.80662	0.170175	4.05239	0.683956	5.8763	4.05239	0.0738731	4.15872	948.023	126.415	133.071	1038.03	83.9699	85.5472	1020.99	37.3889	38.7433	1013.08	37.9905	40.0525	0.775334	5.20083	88.9707	3.38547	61.3955	0.459585		1.61344			0.048943	0.0446706	0.859741	0.364118	4.57083	2.14075	12.0649	2.78429
91500_207	46.36	15.3996	9.93456	0.332175	6834.41	779.116	12.9091		0.0547096	11.1471	1.97114	6.543	0.182152	4.95681	0.747439	5.48992	4.95681	0.0784842	4.27093	1076.61	116.871	125.708	1159.18	84.6961	86.209	1105.7	44.0759	45.3533	1078.72	49.2359	51.0655	2.43976	5.91209	68.7034	3.33119	60.3136	0.50948		1.52763				0.0236654	0.63744	0.33276	4.45385	1.82472	10.7412	2.58332
91500_208	47.5929	14.7568	9.85874	0.310064	6367.71	6367.71	119.942		0.058023	10.2018	1.82928	6.2127	0.176243	4.01975	0.633857	5.67399	4.01975	0.075278	4.73701	1140.01	113.083	123.22	1075.94	95.1041	96.4874	1056.02	40.7863	42.0953	1046.42	38.8268	41.0001	0.909612	5.30708	62.4562	4.3348	62.1842	0.460309		1.59335				0.0666243	0.981236	0.298024	4.83278	1.99572	10.7632	2.88733
FC1_191	151.58	69.3417	34.7918	0.45746	22868.8	22868.8	254.169		0.0563061	3.71153	2.00007	6.18291	0.188293	5.26952	0.842228	5.31086	5.26952	0.0770388	3.23427	1107.18	39.9881	63.2487	1122.2	64.4889	66.4757	1115.54	41.854	43.1936	1112.12	53.827	55.5743	0.305997	6.1052	205.682	18.1986	1037.58	1.28174		6.87591	0.0609861	1.14185	2.66771	0.0988486	20.4135	7.11333	91.8025	35.9229	159.775	32.2272
FC1_192	135.07	64.4341	31.6842	0.477043	23777.5	770.786	7.23911		0.0579019	4.19126	2.05325	5.00288	0.191002	3.90585	0.76393	5.23556	3.90585	0.0779659	3.1262	1137.69	46.3665	67.8114	1146	62.1163	64.1676	1133.38	34.1609	35.8386	1126.8	40.3793	42.7731	0.580598	4.65538	236.928	19.1952	990.58	1.28123		7.27262	0.0978301	1.72593	2.92667	0.130133	17.3915	7.30798	87.5692	34.6758	150.818	30.4545
FC1_193	151.415	74.4234	35.5818	0.491521	23026.2	642.851	7.07625		0.0556069	4.42568	1.99853	5.19257	0.192167	4.37754	0.828599	5.20381	4.37754	0.0754277	2.79283	1093.8	47.1215	66.8945	1079.93	56.0376	58.3482	1115.01	35.141	36.7486	1133.1	45.4873	47.6514	-1.6222	5.18653	218.798	19.2224	1083.82	1.23239		7.14467	0.0474418	1.04741	4.02845		23.4483	8.28281	98.8081	36.7536	166.371	34.7456
FC1_194	458.606	228.066	105.74	0.497302	72552.6	10828	241.003		0.0556077	4.27615	1.91201	4.81534	0.184027	4.43059	0.904714	5.43398	4.43059	0.0753542	1.88609	1093.81	45.53	65.7774	1077.96	37.8553	41.2006	1085.29	32.1036	33.8561	1088.94	44.3916	46.5378	-0.336424	5.05369	233.14	12.9011	1138.46	1.7246		11.0923	0.0299999	0.959431	3.04272	0.132146	19.5965	7.88545	97.4796	37.8552	181.341	37.0961
FC1_196	421.294	213.481	99.5953	0.506727	66199.7	247374	6453.5		0.0564562	3.33603	1.99887	5.20014	0.188689	4.90953	0.931285	5.29973	4.90953	0.0768311	1.71404	1110.05	36.0332	60.6688	1116.79	34.2043	37.8261	1115.13	35.1942	36.8253	1114.27	50.2384	52.1904	0.0772597	5.49926	243.727	13.1938	1141.1	1.43345		9.06642	0.112406	1.238	3.72391	0.061277	21.0863	8.04759	97.2754	39.5857	176.057	37.4367
FC1_197	341.689	266.823	85.711	0.780895	56088.4	1322.9	25.3822		0.0555414	4.02708	1.98432	4.78362	0.189322	4.70316	0.968621	5.28199	4.70316	0.0760167	0.873659	1092.54	42.8296	64.3683	1095.51	17.4893	23.8414	1110.19	32.2963	34.0477	1117.7	48.2626	50.2864	-0.676535	5.24175	265.158	9.9572	1554.33	1.27473	0.0153403	7.56402	0.0569013	1.80523	5.4276	0.244134	36.8757	11.8042	144.276	52.1795	227.649	44.4064
FC1_198	394.613	297.661	98.6715	0.754311	62224.9	62224.9	832.741		0.0577569	3.74082	1.9884	4.62592	0.187808	4.37235	0.928949	5.3246	4.37235	0.0767873	1.5105	1134.92	41.2854	64.0997	1115.67	30.1473	34.2129	1111.58	31.2531	33.0911	1109.49	44.5657	46.7658	0.188125	4.89379	224.875	14.2116	1722.21	1.41401	0.0721352	8.19139	0.122903	2.14203	5.56341	0.214956	37.2124	13.4534	154.997	59.6108	255.2	49.9539
Seiland_171	59.0953	58.2804	7.20853	0.986211	3679.19	242.371	6.37363		0.0258807	7.21612	0.695379	7.38621	0.0916989	3.20994	0.42079	10.9053	3.20994	0.0549992	6.65225	516.449	36.7955	43.5329	412.184	148.734	149.829	536.027	30.7614	31.4454	565.577	17.3811	18.8372	-5.51274	6.8687	52.809	2.55481	348.131	1.79432		3.60762		0.0462152	0.552489	0.581209	6.03499	2.39551	33.1759	13.1034	62.0382	14.1846
Seiland_172	53.7537	53.8682	6.39047	1.00213	3628.66	364.995	7.81131		0.0263657	10.1788	0.717533	7.6102	0.087533	3.99643	0.514365	11.4243	3.99643	0.0594524	6.47639	526.003	52.8498	57.7881	583.703	140.603	141.698	549.21	32.2822	32.9652	540.93	20.7358	21.8862	1.50751	6.91167	50.0338	1.49296	319.654	1.81013		3.47085		0.197139	0.921154	0.665595	5.33881	2.18322	28.1169	12.0969	53.5705	13.3307
Seiland_173	55.447	54.4534	6.55922	0.982079	3550.13	222.776	3.18701		0.027604	5.05554	0.64821	9.6875	0.0867601	4.88563	0.497406	11.526	4.88563	0.0541869	8.36531	550.375	27.449	36.8721	378.82	188.133	189.011	507.377	38.6852	39.1897	536.348	25.1435	26.0788	-5.70988	9.4615	116.087	1.22245	333.943	1.58403		3.82926	0.0225845	0.115428	0.799038	0.735467	5.21098	2.20432	30.3821	12.261	56.2619	12.838
Seiland_174	57.7497	57.5281	6.89673	0.996162	3413.02	3413.02	101.202		0.0287876	5.00316	0.749052	7.35656	0.0855921	3.81294	0.506633	11.6833	3.81294	0.0634713	6.2913	573.642	28.2968	38.1858	724.054	133.448	134.547	567.674	31.99	32.7101	529.415	19.3796	20.55	6.73966	6.26693	101.537	2.02828	344.09	1.81984		3.74637	0.0239447	0.230363	0.493347	0.610246	5.35743	2.08854	27.9099	12.8674	58.7153	13.6247
Seiland_175	55.872	56.221	6.45337	1.00625	3638.35	361.558	8.13005		0.0245192	7.37662	0.604264	13.9266	0.0867174	6.50337	0.463354	11.5317	6.50337	0.0505382	12.3149	489.607	35.6825	41.7681	219.824	284.951	285.566	479.936	53.2631	53.6029	536.094	33.4539	34.1686	-11.7011	14.2219	90.388	2.12796	340.685	1.43647		3.17391		0.168047	0.706691	0.879863	5.52996	2.27813	28.3467	12.5602	55.9764	13.2522
Seiland_176	57.9448	56.8863	6.57376	0.981733	3502.87	353.224	9.94778		0.0268085	8.78788	0.668921	9.47872	0.0825417	4.38264	0.454457	12.1151	4.38264	0.058776	8.40467	534.721	46.3745	51.9326	558.784	183.238	184.088	520.056	38.5761	39.1106	511.276	21.5418	22.5552	1.68833	8.38676	106.2	2.79127	358.409	1.38199		3.44959		0.279666	0.367526	0.687525	5.98666	2.19441	29.5898	11.7197	58.1711	13.3959
Seiland_177	53.5902	53.2519	6.22882	0.993688	3745.7	3745.7	89.134		0.0280036	7.57132	0.654237	14.7004	0.0839171	3.09974	0.203657	11.9165	3.09974	0.0565436	14.3698	558.233	41.6873	48.3764	473.802	317.863	318.368	511.083	59.033	59.3728	519.461	15.4702	16.8857	-1.63934	12.1239	107.026	1.18371	329.185	1.59696		3.03597		0.164286	0.38382	0.783371	5.38375	2.2226	29.0334	11.7124	57.976	12.4383
Zirconia_181	220.693	657.425	22.8846	2.97892	9727.71	2079.36	48.9531		0.0161415	3.01821	0.394337	7.75891	0.0527793	4.47564	0.567416	18.9468	4.47564	0.054188	6.33793	323.649	9.69061	17.5305	378.839	142.539	143.695	337.533	22.2808	22.7327	331.562	14.4644	15.1044	1.76887	7.7724	100.221	7.12783	1628.25	0.703233	0.301877	78.7046	2.49159	33.7006	47.0967	23.913	130.149	28.8247	222.334	60.6249	191.638	31.1104
Zirconia_182	210.703	601.231	21.0238	2.85345	9932.75	481.838	11.4819		0.0155173	4.03738	0.386165	7.59892	0.0527249	3.43736	0.439821	18.9664	3.43736	0.0531197	6.77703	311.229	12.4693	18.7851	333.938	153.625	154.716	331.564	21.4951	21.9495	331.23	11.098	11.9189	0.100873	7.29022	94.7018	6.11368	1507.63	0.699075	0.503207	71.7486	2.08288	30.7836	39.0281	20.2163	119.121	26.1859	208.586	53.7248	174.508	29.414
Zirconia_183	198.034	587.159	20.3299	2.96494	9111.79	461.656	7.25165		0.0162041	4.71559	0.379903	5.94382	0.051901	3.57153	0.58545	19.2674	3.57153	0.0530879	4.75112	324.894	15.1982	21.0463	332.572	107.728	109.28	326.967	16.6157	17.1887	326.182	11.3599	12.1447	0.239968	6.14586	58.1422	8.47813	1495.42	0.350959	0.199715	70.6064	2.18198	30.8399	40.6291	20.264	116.834	26.217	203.758	52.7521	169.397	28.5581
Zirconia_186	290.065	787.666	28.0885	2.71548	12049.2	12049.2	371.452		0.0156927	2.605	0.364331	8.85409	0.0515571	3.51612	0.38659	19.396	3.51612	0.0512515	8.126	314.721	8.13499	16.2468	252.144	186.928	187.853	315.443	24.0077	24.3858	324.074	11.1131	11.9085	-2.73605	8.57605	30.2634	4.97167	1867.74	0.789279	0.244314	99.1239	2.19186	34.1697	46.8736	25.307	145.178	33.6643	267.59	72.1455	230.635	37.5812
Zirconia_187	157.691	371.364	15.1727	2.35501	7453.02	455.165	11.1363		0.0166389	4.71537	0.370883	7.95038	0.054425	3.77898	0.464412	18.3739	3.77898	0.0494239	6.99484	333.541	15.5986	21.5679	167.969	163.396	164.487	320.308	21.8401	22.2647	341.632	12.574	13.354	-6.65737	8.26427	62.9423	3.7233	1143.69	0.452824	0.244123	49.3383	1.21319	19.0534	27.4267	15.2966	83.9953	18.9065	156.451	43.425	139.397	23.5483
Zirconia_188	240.602	594.326	22.5926	2.47016	10849.7	864.625	17.1202		0.0159702	2.67448	0.376988	7.00679	0.0517205	3.86275	0.539152	19.3347	3.86275	0.0528643	5.84588	320.243	8.49734	16.4804	322.942	132.78	134.05	324.819	19.4781	19.97	325.076	12.2455	12.9842	-0.0790923	7.08721	55.666	3.82549	1631.22	0.664047	0.122759	77.1727	1.66563	25.8431	37.9165	21.3806	122.059	27.3571	227.565	59.04	194.685	32.5877
Zirconia_189	248.352	603.833	24.0613	2.43136	11725.7	1237.13	25.5925		0.0167224	3.77314	0.370751	5.68749	0.0535207	3.75975	0.645697	18.6844	3.75975	0.0502411	4.26754	335.2	12.5433	19.3792	206.16	98.9916	100.761	320.21	15.6198	16.2151	336.101	12.3128	13.0962	-4.96263	6.40318	73.3331	3.45921	1635.11	0.767561	0.0946449	80.945	1.75685	27.8973	40.6105	21.8759	120.571	27.943	232.013	60.6717	201.323	34.4333
[truncated: 7 more columns]
